# Supplementary material for: Cumulative incidence of SARS-CoV-2 and associated risk factors among healthcare workers: a cross-sectional study in the Eastern Cape, South Africa
Source: PubMed Central journal article supplement — BMJ Open. 2022 Mar 18;12(3):e058761. doi: 10.1136/bmjopen-2021-058761 (PMC8935006; doi:10.1136/bmjopen-2021-058761), 2022-03-18
Supplement: bmjopen-2021-058761.draft_revisions.pdf [file bmjopen-2021-058761.draft_revisions.pdf]

# BMJ Open

BMJ Open is committed to open peer review. As part of this commitment we make the peer review history of every article we publish publicly available.

When an article is published we post the peer reviewers' comments and the authors' responses online. We also post the versions of the paper that were used during peer review. These are the versions that the peer review comments apply to.

The versions of the paper that follow are the versions that were submitted during the peer review process. They are not the versions of record or the final published versions. They should not be cited or distributed as the published version of this manuscript.

BMJ Open is an open access journal and the full, final, typeset and author-corrected version of record of the manuscript is available on our site with no access controls, subscription charges or pay-per-view fees (<http://bmjopen.bmj.com>).

If you have any questions on BMJ Open's open peer review process please email [info.bmjopen@bmj.com](mailto:info.bmjopen@bmj.com)

# BMJ Open

## Cumulative incidence of SARS-CoV-2 and associated risk factors among healthcare workers in the Eastern Cape, South Africa

|                               |                                                                                                                                                                                                                                                                                                                                                                                                                                                                                                                                                                                                                                                                                                                                                                                                                                                                      |
|-------------------------------|----------------------------------------------------------------------------------------------------------------------------------------------------------------------------------------------------------------------------------------------------------------------------------------------------------------------------------------------------------------------------------------------------------------------------------------------------------------------------------------------------------------------------------------------------------------------------------------------------------------------------------------------------------------------------------------------------------------------------------------------------------------------------------------------------------------------------------------------------------------------|
| Journal:                      | <i>BMJ Open</i>                                                                                                                                                                                                                                                                                                                                                                                                                                                                                                                                                                                                                                                                                                                                                                                                                                                      |
| Manuscript ID                 | bmjopen-2021-058761                                                                                                                                                                                                                                                                                                                                                                                                                                                                                                                                                                                                                                                                                                                                                                                                                                                  |
| Article Type:                 | Original research                                                                                                                                                                                                                                                                                                                                                                                                                                                                                                                                                                                                                                                                                                                                                                                                                                                    |
| Date Submitted by the Author: | 29-Oct-2021                                                                                                                                                                                                                                                                                                                                                                                                                                                                                                                                                                                                                                                                                                                                                                                                                                                          |
| Complete List of Authors:     | Stead, David; Walter Sisulu University Faculty of Health Sciences, Department of Internal Medicine; Frere Hospital, Internal Medicine<br>ADENIYI, OLADELE VINCENT; Walter Sisulu University Faculty of Health Sciences, Department of Family Medicine; Cecilia Makiwane Hospital, Department of Family Medicine<br>Singata-Madliki, Mandisa; University of Fort Hare East London Campus, Department of Public health; Wits University, Obstetrics and gynaecology<br>Abrahams, Shareef; National Health Laboratory Service, Division of Microbiology, Department of Pathology<br>Batting, Joanne; University of Fort Hare East London Campus, Department of Public health<br>Jelliman, Eloise; Frere Hospital, Radiology<br>Parrish, Andrew; Walter Sisulu University Faculty of Health Sciences, Internal Medicine; Frere Hospital, Department of Internal Medicine |
| Keywords:                     | COVID-19, Infection control < INFECTIOUS DISEASES, Health & safety < HEALTH SERVICES ADMINISTRATION & MANAGEMENT                                                                                                                                                                                                                                                                                                                                                                                                                                                                                                                                                                                                                                                                                                                                                     |
|                               |                                                                                                                                                                                                                                                                                                                                                                                                                                                                                                                                                                                                                                                                                                                                                                                                                                                                      |

SCHOLARONE™  
Manuscripts

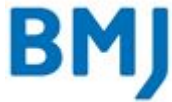

I, the Submitting Author has the right to grant and does grant on behalf of all authors of the Work (as defined in the below author licence), an exclusive licence and/or a non-exclusive licence for contributions from authors who are: i) UK Crown employees; ii) where BMJ has agreed a CC-BY licence shall apply, and/or iii) in accordance with the terms applicable for US Federal Government officers or employees acting as part of their official duties; on a worldwide, perpetual, irrevocable, royalty-free basis to BMJ Publishing Group Ltd ("BMJ") its licensees and where the relevant Journal is co-owned by BMJ to the co-owners of the Journal, to publish the Work in this journal and any other BMJ products and to exploit all rights, as set out in our [licence](#).

The Submitting Author accepts and understands that any supply made under these terms is made by BMJ to the Submitting Author unless you are acting as an employee on behalf of your employer or a postgraduate student of an affiliated institution which is paying any applicable article publishing charge ("APC") for Open Access articles. Where the Submitting Author wishes to make the Work available on an Open Access basis (and intends to pay the relevant APC), the terms of reuse of such Open Access shall be governed by a Creative Commons licence – details of these licences and which [Creative Commons](#) licence will apply to this Work are set out in our licence referred to above.

Other than as permitted in any relevant BMJ Author's Self Archiving Policies, I confirm this Work has not been accepted for publication elsewhere, is not being considered for publication elsewhere and does not duplicate material already published. I confirm all authors consent to publication of this Work and authorise the granting of this licence.

1  
2  
3  
4  
5  
6  
7  
8  
9  
10  
11  
12  
13  
14  
15  
16  
17  
18  
19  
20  
21  
22  
23  
24  
25  
26  
27  
28  
29  
30  
31  
32  
33  
34  
35  
36  
37  
38  
39  
40  
41  
42  
43  
44  
45  
46  
47  
48  
49  
50  
51  
52  
53  
54  
55  
56  
57  
58  
59  
60

## Cumulative incidence of SARS-CoV-2 and associated risk factors among healthcare workers in the Eastern Cape, South Africa

\*David Stead<sup>1,2</sup>, Oladele Vincent Adeniyi<sup>3,4</sup>, Mandisa Singata-Madliki<sup>5,6</sup>, Shareef Abrahams<sup>7</sup>  
Joanne Batting<sup>5</sup>, Eloise Jelliman<sup>8</sup>, and Andrew Parrish<sup>1,2</sup>

### Affiliations:

1. Department of Internal Medicine, Frere Hospital, East London, South Africa.
2. Department of Internal Medicine, Faculty of Health sciences, Walter Sisulu University, Mthatha, South Africa.
3. Department of Family Medicine, Cecilia Makiwane Hospital, East London, South Africa.
4. Department of Family Medicine, Faculty of Health sciences, Walter Sisulu University, Mthatha.
5. Effective Care Research Unit, Department of Public Health, University of Fort Hare, East London, South Africa.
6. Department of Obstetrics and Gynaecology, Wits University, Johannesburg, South Africa.
7. Division of Medical Microbiology, Department of Pathology, National Health Laboratory Service, Port Elizabeth, South Africa.
8. Department of Radiology, Frere Hospital, East London, South Africa.

### \*Corresponding Author:

Dr David F. Stead, (MChB, FCP, Cert. Infectious diseases, MPhil)

Department of Internal Medicine,

Frere Hospital

East London, South Africa.

Email: [dfstead@gmail.com](mailto:dfstead@gmail.com)

## Abstract

**Objectives:** This study assesses the cumulative incidence of SARS-CoV-2 infection among healthcare workers (HCWs) during South Africa's first wave and examines the associated demographic, health-related, and occupational risk factors for infection.

**Methods:** Multi-stage cluster sampling was used in a cross-sectional study to recruit 1,309 HCWs from two academic hospitals in the Eastern Cape, South Africa over six weeks in November and December 2020. Prior test results for SARS-CoV-2 polymerase chain reaction (PCR) and participants' characteristics were recorded while a blood sample was drawn for detection of IgG antibodies against SARS-CoV-2 nucleocapsid protein. The primary outcome measure was the SARS-CoV-2 cumulative incidence rate, defined as the combined total of positive results for either PCR or IgG antibodies, divided by the total sample. The secondary outcome was significant risk factors associated with infection.

**Results:** Of the total participants included in the analysis (N=1295), the majority were female (81.5%), of black race (78.7%) and nurses (44.8%). A total of 390 (30.1%) HCWs had a positive SARS-CoV-2 PCR result and SARS-CoV-2 antibodies were detected in 488 (37.7%), yielding a cumulative incidence of 47.2% (n = 611). In the adjusted logistic regression model, being overweight (Adjusted odds ratio (AOR) = 2.15, 95% CI 1.44-3.20), obese (AOR = 1.37, 95% CI 1.02-1.85) and living with HIV (AOR = 1.78, 95% CI 1.38-2.08) were independently associated with SARS-CoV-2 infection. There was no significant difference in infection rates between high, medium and low COVID-19 exposure working environments.

**Conclusions:** The high SARS-CoV-2 cumulative incidence in the cohort was surprising this early in the epidemic and probably related to exposure both in and outside the hospitals. To mitigate the impact of SARS-CoV-2 among HCWs, infection prevention and control (IPC) strategies should target community transmission in addition to screening for HIV and metabolic conditions.

### Strengths and limitations of this study:

- This is a large representative sample of the total workforce of the two hospitals, with a good spectrum of staff category.
- Combining the historical SARS-CoV-2 PCR results with the Nucleocapsid IgG enabled capturing of some of the asymptomatic and missed SARS-CoV-2 infections.
- This is one of the first studies to look at SARS-CoV-2 infection risk factors in a high exposure environment in Africa.

- A limitation is that HIV ELISA and CD4 counts were not tested, but relied on self-report, which may likely underestimate the burden of HIV in the cohort.

**Funding statement:**

This work was supported by the South African Medical Research Council (SAMRC) Grant number: 0000062597106824, and the Walter Sisulu University Health Sciences Personal publications fund (No number applicable).

**Competing interests statement:**

The authors declare no conflict of interest.

**Keywords:** COVID-19, cumulative infection rate, Eastern Cape, healthcare workers, SARS-CoV-2

**Background**

South Africa reported its first imported case of SARS-CoV-2 on 5 March 2020 and subsequently experienced high rates of transmission throughout the country. The first wave peaked in July 2020, the second wave in late December 2020 and a third wave occurred in June 2021, with total cases approaching 3 million.<sup>1</sup> The Eastern Cape ranked 4th out of South Africa's nine provinces for cumulative SARS-CoV-2 cases, with 290 898 cases recorded on 2 October 2021.<sup>1</sup>

Healthcare workers (HCWs) are responsible for providing acute in-hospital care for patients with moderate and severe COVID-19 who require oxygen support and other therapies.<sup>2</sup> The HCWs are exposed to infectious droplets and aerosols, putting them at increased risk for infection.<sup>2</sup> Despite infection prevention and control measures at the health facility level, HCWs still acquire SARS-CoV-2 at a higher rate than the general population.<sup>2-4</sup> A prospective study of 200 frontline HCWs in the United Kingdom (UK), during the first peak of viral transmission involving the collection of twice weekly nasopharyngeal swabs for reverse transcription polymerase chain reaction (RT-PCR) and monthly blood samples for serology, showed that 44% became infected. This was more than double the rate of the local population.<sup>3</sup> A smartphone application allowing self-reporting of positive SARS-CoV-2 PCR results was used in a survey of almost 100,000 UK and United States (US) HCWs. Incident cases in these HCWs

1  
2  
3 were almost 12-fold greater than in a two million comparator sample of the general population.<sup>2</sup>  
4 Another UK study found a SARS-CoV-2 seroprevalence of 16.3% among HCWs compared to  
5 a 5.9% national community rate.<sup>4</sup>  
6  
7  
8  
9

10 Reported information on SARS-CoV-2 infections among HCWs in Africa is scanty. Two  
11 hundred and twenty-two HCWs from single South African paediatric unit were included in a  
12 global comparative seroprevalence study (recruited June to August 2020), with a seropositivity  
13 of 10.36% (95% CI: 7-15.07).<sup>5</sup> A pre-print of a serosurvey of 500 HCWs in Blantyre, Malawi,  
14 reported a 12.3% positivity rate.<sup>6</sup> The Eastern Cape Department of Health reported a total of  
15 11,262 HCWs infected with SARS-CoV-2 by 18 February 2021, with 262 deaths (2.3% fatality  
16 rate). The highest infection rates were among state-employed doctors and nurses (18.2% and  
17 22.3%, respectively) compared to a 2.8% for the province as a whole.<sup>7</sup>  
18  
19  
20  
21  
22  
23  
24  
25

26 The potentially high SARS-CoV-2 exposure environment in hospitals enables acquisition of  
27 data on infection rates and associated risk factors amongst HCWs, that can assist in  
28 understanding the dynamics of SARS-CoV-2 transmission and the efficacy of infection  
29 prevention and control measures. In some studies, high-exposure clinical areas such as  
30 Accident & Emergency Units, acute medical wards and intensive care units have been  
31 associated with increased HCW infections when compared to administrative or support service  
32 areas.<sup>8-10</sup> Others have shown no difference between staff roles, suggesting that most infections  
33 were acquired outside of areas of patient contact, or outside of the hospital.<sup>11,12</sup> Inadequate  
34 availability or faulty use of personal protective equipment (PPE) are both factors shown to  
35 increase the risk of infection.<sup>2,13</sup> Male HCWs and those with at least one comorbidity also  
36 appear to have an increased risk of acquiring SARS-CoV-2 infection.<sup>8,14</sup> Outside the healthcare  
37 environment, a study of 3,802 SARS-CoV-2 tests performed in the UK found that infection  
38 risk was increased by male gender, age 40-64 years, black ethnicity, lower socio-economic  
39 status, chronic kidney disease, and obesity. In this study, smokers had a lower risk of  
40 infection.<sup>15</sup>  
41  
42  
43  
44  
45  
46  
47  
48  
49  
50  
51

52  
53 SARS-CoV-2 is a global pandemic, but has affected individual countries and their health  
54 systems to varying degrees. Explanations for this include a complex interaction of population  
55 and genetic vulnerabilities, social mitigation behaviour, and health system interventions. Due  
56 to the paucity of evidence around the impact of SARS-CoV-2 on HCWs in Africa, this study  
57 was undertaken to gain insights in this setting. Frere and Cecilia Makiwane hospitals are both  
58  
59  
60

1  
2  
3 in the Eastern Cape Province in South Africa. This is an under-resourced province with a less  
4 robust healthcare system than that in some other provinces. Both facilities experienced high  
5 numbers of staff infections and absenteeism during the first wave of SARS-CoV-2, with  
6 considerable disruption to health service delivery. This study was conducted to assess the  
7 cumulative incidence of staff SARS-CoV-2 infections (symptomatic and asymptomatic), and  
8 their associated demographic, health-related, and occupational risk factors. Findings from the  
9 study may inform planning and improve IPC measures related to infections with SARS-CoV-  
10 2 and other respiratory viruses in the province.  
11  
12  
13  
14  
15  
16

## 17 **Methods**

### 18 **Study design and settings**

19  
20 This observational cross-sectional study was conducted in two academic hospitals: Frere and  
21 Cecilia Makiwane, in the central region of the Eastern Cape, South Africa. Cecilia Makiwane  
22 is a regional hospital that provides levels one and two healthcare services to the residents of  
23 Buffalo City and the Amathole district. Frere hospital is a tertiary institution which serves as a  
24 referral hospital for four district municipalities: Buffalo City, Amathole, Chris Hani and Joe  
25 Gqabi. Together they serve a population of almost three million residents and have over 4,000  
26 HCWs: doctors, nurses, pharmacists, allied workers and support staff (administration, laundry,  
27 kitchen and mortuary).<sup>16</sup>  
28  
29  
30  
31  
32  
33  
34  
35

### 36 **Re-organisation of hospitals during the ‘first wave’**

37  
38 At the onset of the first wave, local protocols were developed in accordance with the National  
39 Institute of Communicable Diseases Guidelines for the management of confirmed or suspected  
40 cases of COVID-19.<sup>17</sup> Designated COVID-19 units were created from the existing emergency  
41 units of the two hospitals. All individuals meeting the criteria for ‘patient under investigation’  
42 and/or confirmed cases of COVID-19 were directed to the designated area within the  
43 emergency unit, where triaging and clinical evaluations were performed by the attending  
44 clinicians. In both hospitals, patients meeting the criteria for admission based on the severity  
45 of their condition and/or co-morbidities were admitted into designated COVID-19 wards.  
46 Patients who presented in critical condition were admitted into the hospitals’ intensive care  
47 units. The head of the internal medicine department supervised in-patient admissions in both  
48 hospitals, thereby ensuring that the COVID-19 protocol was the same at both facilities. All  
49 clinicians working in the designated COVID-19 wards and emergency units received training  
50 on the effective use of PPE. In addition, the hospitals formed logistics committees comprising  
51  
52  
53  
54  
55  
56  
57  
58  
59  
60



1  
2  
3 senior managers of the hospital to ensure a constant supply of PPE for use by all personnel  
4 caring for patients with COVID-19. The Occupational Health and Safety (OHS) unit of each  
5 hospital created a database of COVID-19 infection among its HCWs. HCWs were required to  
6 submit confirmation of a SARS-CoV-2 PCR positive result as evidence of diagnosis and  
7 permission to proceed with the mandatory isolation of 10–14 days, in accordance with the  
8 guidelines.<sup>17</sup>  
9  
10  
11  
12  
13  
14

### 15 **Participants**

16 All categories of HCWs in the two hospitals were eligible to participate in the study. To ensure  
17 inclusivity of all HCWs, the study adopted a multi-stage cluster sampling technique. Risk  
18 profiles were categorised according to the exposure areas identified by Iversen et al.: ‘high  
19 risk’ if the HCWs worked in Accident & Emergency units, designated COVID-19 wards, and  
20 intensive care units (ICUs); ‘intermediate risk’ if HCWs worked in non-respiratory admission  
21 wards, outpatient departments (OPDs), and other clinical areas; and ‘low risk’ if the HCWs  
22 performed administrative tasks and other non-clinical duties.<sup>8</sup> Prior to recruitment, mass  
23 sensitisation about the study was conducted through union leaders, departmental heads and  
24 clinical managers. In addition, a communique was circulated across the two hospitals to create  
25 awareness of the study. Each working area was allocated specific days to allow those on night  
26 shifts as well as those who were off-duty to participate with minimal interruption to service  
27 delivery. In addition, a central recruitment area was created in each of the two hospitals to cater  
28 for HCWs who might have missed the dates allocated by their departments. There was no  
29 sample size calculation performed, but rather as many staff recruited as possible within the  
30 budgeted time frame for the study. The study was implemented between 4 November and 18  
31 December 2020. SARS-CoV-2 vaccination for HCWs in South Africa only became available  
32 in March 2021.  
33  
34  
35  
36  
37  
38  
39  
40  
41  
42  
43  
44  
45  
46  
47

### 48 **Procedure**

49 Each department/work area provided a dedicated station where HCWs completed a manual  
50 questionnaire and blood samples were drawn. Two research nurses and four assistants  
51 underwent training on the research process and study instrument over a three-day period prior  
52 to commencement of the study. The research nurses measured HCWs’ height and weight  
53 according to standard protocols. Venous blood samples (about 5 mL) were drawn by the trained  
54 research nurses using an aseptic technique. All blood samples were tested for the IgG  
55  
56  
57  
58  
59  
60

1  
2  
3 antibodies against SARS-CoV-2 nucleocapsid protein by the National Health Laboratory  
4 Services in accordance with standard protocols.  
5  
6  
7

8  
9 To link the results of SARS-CoV-2 PCR tests recorded on the OHS databases with the SARS-  
10 CoV-2 IgG antibody tests, while maintaining confidentiality, a unique identifying number was  
11 used to encode the participants' details (names, date of birth and area of work) in the research  
12 register, which was accessible only to the investigators. The questionnaire data for the study  
13 were captured on the REDCap® online database of the South African Medical Research  
14 Council server.  
15  
16  
17

### 20 **Main outcome measures**

21  
22 Serum samples were analysed on an Abbott ARCHITECT i1000SR instrument using the  
23 Abbott SARS-CoV-2 IgG assay in accordance with the manufacturer's instructions. This is a  
24 chemiluminescent microparticle immunoassay (CMIA) for the qualitative detection of IgG  
25 against the SARS-CoV-2 nucleoprotein. Strength of response in relative light units reflects  
26 quantity of IgG present, and is compared to a calibrator to determine the calculated index  
27 (specimen/calibrator [S/C]) for a sample (with positive at 1.4 or greater). This assay has a  
28 specificity of 99.9% from 1020 pre-COVID-19 serum specimens and a sensitivity of 100% at  
29 17 days after symptom onset and 13 days after PCR positivity.<sup>18</sup>  
30  
31  
32  
33  
34  
35  
36  
37

38 Seropositivity was categorised as a binary outcome: a positive result of SARS-CoV-2 IgG was  
39 considered as evidence of prior infection (humoral immune response), while a negative result  
40 was considered as either non-exposure or as a decayed (lost) immune response.  
41

42  
43 Cumulative incidence: This was a combination of a SARS-CoV-2 diagnosis (positive SARS-  
44 CoV-2 PCR and/or positive SARS-CoV-2 IgG).  
45

46 Missed SARS-CoV-2 infection: This was defined as seropositive SARS-CoV-2 IgG without  
47 any documented diagnosis of SARS-CoV-2. The latter included symptomatic individuals with  
48 negative SARS-CoV-2 PCR or who never tested and asymptomatic individuals who had not  
49 undergone PCR testing.  
50  
51  
52  
53  
54

### 55 **Covariates**

56 Sociodemographic and clinical covariates were included in this study. Age, sex, race, highest  
57 level of education, profession and smoking status, among others, were self-reported in the  
58 questionnaire. Age was categorised by decades for the multivariate analysis. Exposure risks  
59  
60

1  
2  
3 (such as direct contact with patients with COVID-19) and training on the use of PPE were also  
4 obtained. Certain comorbidities (diabetes, hypertension, HIV, Tuberculosis, Chronic kidney  
5 disease, heart disease, Asthma/Chronic obstructive pulmonary disease, liver disease, cancer,  
6 pregnancy) or immunosuppressive therapy, that have been shown to increase the risk of  
7 acquiring SARS-CoV-2 were explored in the questionnaire.<sup>2,8,13,15,19</sup> A prior SARS-CoV-2  
8 diagnosis was self-reported by the participants and validated through the OHS personnel  
9 database in each hospital. The questionnaire was completed by each participant, with assistance  
10 offered to those participants requiring it.  
11  
12  
13  
14  
15  
16  
17  
18

### 19 **Data analysis**

20 Data were exported from the REDCap<sup>®</sup> online database for analysis using the IBM SPSS  
21 version 25.0 software (IBM SPSS, Chicago, Illinois) after cross-checking for completeness and  
22 accuracy. The means  $\pm$  standard deviations were estimated for continuous data and counts and  
23 proportions were estimated for categorical data for the sociodemographic characteristics of the  
24 participants. The proportion of HCWs with either a SARS-CoV-2 PCR diagnosis or positive  
25 IgG antibodies, or both, were reckoned as cumulative incidence in the study. The cumulative  
26 incidence was disaggregated by sociodemographic and clinical factors.  
27  
28  
29  
30  
31  
32  
33

34 The associations between the cumulative incidence and risk factors (sociodemographic and  
35 clinical) were explored using the Pearson  $\chi^2$  test. We fitted both unadjusted and adjusted multi-  
36 variate logistic regression models to examine the independent risk factors for cumulative  
37 infection with SARS-CoV-2 among the HCWs in the study. Variable selection in the model  
38 analysis was guided by known risk factors reported previously in other studies.<sup>8,13,15</sup> A p-value  
39 less than 0.05 was considered statistically significant.  
40  
41  
42  
43  
44  
45  
46

### 47 **Ethical Considerations**

48 The Walter Sisulu University Ethics Committee granted approval for the implementation of  
49 the study (Reference: 087/2020), as well as the Eastern Cape Provincial Department of Health  
50 and local hospitals ethics committee. Each participant provided written informed consent for  
51 the study. Participants' rights to privacy and the confidentiality of clinical data were respected  
52 during and after the study. The research process followed the Helsinki Declaration and local  
53 institutional policy. All hard copies of materials used in the study were locked securely and  
54 soft copies were password-protected in the computer in the research office.  
55  
56  
57  
58  
59  
60

## Patient and public involvement

There was no public or patient involvement in the design, conduct or reporting of this research, as patients were not included. The healthcare worker participants were given their individual SARS-CoV-2 IgG results via cellular messaging. The main findings of the study will be shared with the respective hospital management teams.

## Results

A total of 1,309 HCWs participated in the study from both hospitals, 656 from Frere Hospital and 653 from Cecilia Makiwane Hospital. Eleven blood samples for SARS-CoV-2 IgG serology were missing or rejected by the laboratory and were excluded from the final analysis. Data for another three participants were excluded due to missing data on the main outcome measures. Data for 1,295 HCWs were included in the final analysis.

### Baseline characteristics of the participants (N = 1,295)

The participants were predominantly women (81.5%), black (78.7%), had undergone tertiary education (71.5%), and most had never smoked (91.0%). In terms of professional category, nurses predominated (44.8%), followed by support staff (28.8%) and medical doctors (13.6%). Most (77.1%) participants reported direct contact with patients with COVID-19 and had attended training on PPE use (79.4%) (Table 1).

### SARS-CoV-2 cumulative incidence

SARS-CoV-2 infection was confirmed (PCR positive) in 390 participants (30.1%), and a SARS-CoV-2 IgG positive result occurred in 488 (37.7%), participants giving a cumulative incidence of 47.2% (611 HCWs). Of the 390 PCR positive cases, 123 (31.5%) were SARS-CoV-2 IgG negative at the time of study. One hundred and forty-six of 640 (22.8%) PCR negative cases were IgG positive indicating potentially false negative PCR tests or being tested at the incorrect time. The SARS-CoV-2 IgG picked up an additional 17.1% (n = 221) missed infections in this cohort (146 HCWs with negative PCR results and 75 who never tested) (Table 2).

### **Risk factors for SARS-CoV-2 infection among the HCWs**

When examining sociodemographic and exposure risk factors for infection (Table 3), age, race, level of educational, smoking status, professional category, and work area were all significantly associated with SARS-CoV-2 infection ( $p < 0.05$ ). Among the co-morbid conditions (Table 4), only Body Mass Index (BMI) was significantly associated with SARS-CoV-2 infection.

In an unadjusted logistic regression analysis (Table 5), female sex, coloured ethnicity, a primary education, active smokers, medical doctors and allied staff, use of public transport, and being overweight and obese were significantly associated with SARS-CoV-2 infection. However, in the adjusted logistic regression (Table 5), comorbidity with HIV, and being overweight and obesity were independently associated with SARS-CoV-2 infection. Individuals who were living with HIV were almost twice as likely to be infected with SARS-CoV-2 (Adjusted Odd Ratio [AOR] = 1.78; 95% Confidence Interval [CI]: 1.38-2.08). Individuals who were overweight were twice as likely to be infected with SARS-CoV-2 (AOR = 2.15; 95% CI 1.44-3.20). Similarly, those who were obese were slightly more likely to be infected with SARS-CoV-2 (AOR = 1.37; 95% CI 1.02-1.85).

### **Discussion**

This cross-sectional survey of 1 295 HCWs from two large referral hospitals in the Eastern Cape Province combined two diagnostic modalities (SARS-CoV-2 PCR and SARS-CoV-2 IgG antibodies) to estimate the cumulative incidence of SARS-CoV-2 infection. The study showed a high rate of SARS-CoV-2 infection (47.2%) after the first wave of COVID-19 among the HCWs in the region. This rate is double the official figures reported for doctors and nurses subsequent to the second wave in the Eastern Cape province (18.2-22.3%).<sup>7</sup> The 30.1% SARS-CoV-2 PCR positivity is significantly higher than the pooled prevalence of 11% (95% CI; 7-15%) from a systematic review of 46 studies among HCWs worldwide.<sup>20</sup> Similarly the 37.7% SARS-CoV-2 IgG seropositivity is higher than the pooled prevalence of 7% (95% CI; 4-11%) of 27,445 HCWs in the same review.<sup>20</sup>

In order to obtain reliable epidemiologic data on the infection rate with SARS-CoV-2 for strategic planning, a minimum of two or more data sources should be combined. Findings from this study demonstrate the importance of combining PCR results with antibody testing within a population to assess more accurately the cumulative incidence of SARS-CoV-2 infection. Neither of the modalities alone was accurate in estimating the infection rate in the study as reflected by the 31.5% of IgG negative results in HCWs who had been documented as SARS-

1  
2  
3 CoV-2 PCR positive. These most likely represent cases of decay in the humoral immune  
4 response with IgG levels falling below the assay detection threshold over time. A study of the  
5 duration of SARS-CoV-2 IgG anti-nucleocapsid antibodies among 452 HCWs reported decline  
6 starting within 1 month after first positive PCR, with an estimated half-life of 85 days and 50%  
7 seronegative after 7 months.<sup>21</sup> On the other hand, SARS-CoV-2 IgG testing identified 17.1%  
8 of participants with infections that had been missed by PCR. Two thirds (146/221) of these  
9 missed infections reported negative PCR tests. These likely represent false negative PCR  
10 results; suboptimal sample collections, or swabs that were taken before or after the peak of  
11 viral shedding.<sup>22-24</sup> The other third (75/221) of the missed infections had never had a PCR test  
12 performed. These were likely asymptomatic infections or patients with mild symptoms that did  
13 not lead to PCR testing.  
14  
15  
16  
17  
18  
19  
20  
21  
22  
23

24 In terms of risk factors for SARS-CoV-2 infection among HCWs, the only significant risk  
25 factors in the adjusted multivariate logistic regression analysis were having an increased BMI  
26 (overweight or obese) and being HIV positive. While these factors have been reported as risks  
27 for infection among the general population in some reports<sup>2,5,12,14,18</sup>, this is the first time they  
28 have been linked in a specifically HCW population. Stratifying areas of work into low, medium  
29 and high risk for SARS-CoV-2 exposure did not identify significant differences in infection  
30 risk, contrary to findings by Iversen et al.<sup>8</sup> There was also no difference in infection prevalence  
31 across different professions. These are important negative findings of this study, and contribute  
32 some insights into SARS-CoV-2 exposure and transmission in the hospital environment. Of  
33 interest for epidemiologic purposes are two pertinent questions. ‘Why did doctors and nurses  
34 working in designated COVID-19 clinical areas not experience higher infection rates than non-  
35 clinical staff?’ and ‘Did improved use of PPE in these designated clinical areas effectively level  
36 this risk?’  
37  
38  
39  
40  
41  
42  
43  
44  
45  
46  
47

48 Despite a large proportion (80%) of HCWs having been trained on the use of PPE, and they  
49 confirmed that PPEs were available for use, there was no correlation with SARS-CoV-2  
50 infection in the cohort. A prospective study of SARS-CoV-2 infections among 10,034 UK  
51 HCWs, showed a lower risk of infection among ICU clinical staff, suggesting that training on  
52 PPE and strict adherence to infection control protocols protected staff in high risk areas.<sup>9</sup> While  
53 there were concerns about inadequate quantities and quality of PPE during the period prior to  
54 the study, there was never a total shortage of PPE for use in COVID-19 clinical areas in either  
55 of the two facilities. Another plausible explanation for the results could be the strict adherence  
56  
57  
58  
59  
60



1  
2  
3 to symptom screening of all staff in the COVID-19 clinical areas throughout the period. Prompt  
4 diagnosis and isolation of infected individuals will prevent further spread among HCWs in the  
5 same work areas<sup>2,3</sup>. Furthermore, it was not infrequent for COVID-19 cases to be diagnosed  
6 in the non-COVID-19 clinical areas, which could account for similarly high proportions of  
7 staff infection in low, medium and high-risk clinical areas.  
8  
9

10  
11  
12  
13 Transmission of SARS-CoV-2 between HCWs in the common areas during tea and lunch  
14 breaks, when staff interact socially with or without masks was not measured in the study, but  
15 is quite probable to have occurred to some degree. It was hypothesised that taking shared or  
16 public transport to work would increase the risk of infection compared to solo vehicle transport,  
17 but this was not found to be significant. At the time of this study, there were no community  
18 seroprevalence data with which to compare our findings. During the second epidemiologic  
19 wave, Sykes et al. reported a seropositivity rate of 63% among blood donors from the Eastern  
20 Cape, the highest among four provinces sampled in the country in January 2021.<sup>25</sup> This study  
21 only sampled 1,457 donors, a highly selected group of healthy volunteers from four provinces.  
22 It is therefore difficult to estimate the community prevalence at the time of our study.  
23 Notwithstanding, there is a strong possibility of a high- exposure environment outside of the  
24 hospitals in the region. A previous UK study found that having a household COVID-19 contact  
25 was the strongest risk factor for HCW infection [AOR 4.82; 95% CI 3.45–6.72].<sup>9</sup>  
26  
27  
28  
29  
30  
31  
32  
33  
34  
35  
36  
37

38 Being overweight or obese has been linked to increased susceptibility to SARS-CoV-2  
39 infection, as well as to disease severity and increased mortality. A meta-analysis of 20 studies  
40 assessing obesity and risk of SARS-CoV-2 infection found an odds ratio of 1.46 (95% CI 1.30-  
41 1.65).<sup>26</sup> Poorer outcomes for respiratory viruses in the obese had been described prior to SARS-  
42 CoV-2 with the H1N1 influenza pandemic.<sup>27</sup> The mechanisms for the increased vulnerability  
43 to SARS-CoV-2 among the overweight and obese are complex. Obesity is associated with a  
44 pro-inflammatory phenotype and systemic low-grade inflammation.<sup>27</sup> Obesity dampens and  
45 delays both the innate and the adaptive immune response to infection with reduced efficacy of  
46 B- and T- cell responses. Obesity is also associated with poorer response to vaccination, likely  
47 through the same immune dampening effects.<sup>27</sup> This sample of HCWs revealed alarmingly  
48 high rates of being either overweight (22.7%) or obese (63.1%), which is a concern due to  
49 increased vulnerability to respiratory viral infections as well as the non-communicable disease  
50 risks linked such as type 2 diabetes mellitus, hypertension, cardiovascular diseases and certain  
51 cancers.<sup>28</sup>  
52  
53  
54  
55  
56  
57  
58  
59  
60

1  
2  
3  
4  
5 There is epidemiological evidence for an increased susceptibility to SARS-CoV-2 with HIV  
6 infection. A systematic review and meta-analysis of almost 21 million people across multiple  
7 continents reported a risk ratio of 1.24 (95% CI 1.05-1.46) for SARS-CoV-2 infection among  
8 people living with HIV compared to those uninfected by HIV.<sup>29</sup> The HIV prevalence of 7.3%  
9 in this cohort may be an underestimate, given the self-reported nature of the data and some  
10 infected individuals may not have been diagnosed. The estimated adult HIV prevalence in the  
11 local district is 13.6%, as a comparison.<sup>30</sup> Data on CD4 cell counts and whether HIV infected  
12 HCWs were on antiretroviral therapy were not obtained in this study, but could have added  
13 more insights into the HIV-related risk. Like obesity, HIV is an important vulnerability to be  
14 managed among HCWs in relation to SARS-CoV-2 and other infections such as  
15 *Mycobacterium tuberculosis*.  
16  
17  
18  
19  
20  
21  
22  
23  
24  
25

### 26 **Strengths and limitations**

27 This is the first reported study to have combined two diagnostic modalities to estimate the  
28 cumulative incidence of SARS-CoV-2 infection among HCWs in South Africa. Findings will  
29 inform IPC policies in the region. However, this study does have some limitations. Due to the  
30 pragmatic nature of the local policy relating to PCR testing for SARS-CoV-2, testing was  
31 largely limited to symptomatic staff, which would have missed some asymptomatic infections.  
32 HIV serology and CD4 counts were not tested, but relied on self-reporting of individual HIV  
33 status, which may likely underestimate the burden of HIV in the cohort.  
34  
35  
36  
37  
38  
39  
40

### 41 **Conclusion**

42 We report a high SARS-CoV-2 cumulative incidence of 47.2% after the first epidemiologic  
43 wave among HCWs from two referral hospitals in the Eastern Cape, South Africa. This is one  
44 of the highest reported in the literature and more than double that of the official figures for  
45 HCWs in the region. Being overweight or obese were significant risks for infection, and over  
46 85% of HCWs fell into these categories. HIV infection was also associated with increased  
47 infection in the cohort. There were similar rates of infection across low, medium and high  
48 SARS-CoV-2 transmission risk areas, suggesting that significant transmission of infection  
49 occurred between colleagues or outside the workplace. Staff wellness programmes should  
50 address weight reduction and regular HIV testing and treatment, to mitigate vulnerabilities in  
51 this essential workforce.  
52  
53  
54  
55  
56  
57  
58  
59  
60



## Acknowledgements

The authors are grateful for the support and enthusiasm shown by the management and staff of the two hospitals toward the implementation of the study.

## References

1. *COVID-19 Weekly Epidemiological Brief*; 2021. <https://www.nicd.ac.za/wp-content/uploads/2021/10/COVID-19-Weekly-Epidemiology-Brief-week-39-2021.pdf>.
2. Nguyen L, Drew D, Graham M, Joshi A. Risk of COVID-19 among front-line health-care workers and the general community: a prospective cohort study. *Lancet Public Heal*. 2020;5(July 31):475-483.
3. Houlihan CF, Vora N, Byrne T, et al. Pandemic peak SARS-CoV-2 infection and seroconversion rates in London frontline health-care workers. *Lancet*. 2020;396(10246):e6-e7. doi:10.1016/S0140-6736(20)31484-7
4. Coltart CEM, Wells D, Sutherland E, Fowler A, Sutherland E. National cross-sectional survey of 1.14 million NHS staff SARS-CoV-2 serology tests: a comparison of NHS staff with regional community seroconversion rates. *BMJ Open*. 2021:1-7. doi:10.1136/bmjopen-2021-049703
5. Goldblatt D, Johnson M, Falup-Pecurariu O, Ivaskeviciene I, Spoulou V, Tamm E. Cross-sectional prevalence of SARS-CoV-2 antibodies in healthcare workers in paediatric facilities in eight countries. *J Hosp Infect*. 2021;110:60-66.
6. Chibwana M, Khuzwayo J, Kham'gona R. *High SARS-CoV-2 Seroprevalence in Health Care Workers but Relatively Low Numbers of Deaths in Urban Malawi*; 2020. <https://doi.org/10.1101/2020.07.30.20164970>.
7. Eastern Cape DoH. *Eastern Cape Health Department. Daily Epidemiological Report for SARS-Cov\_2 Report No. 321*; 2021.
8. Iversen K, Bundgaard H, Hasselbach R. Risk of COVID-19 in health-care workers in Denmark: an observational cohort study. *Lancet Infect Dis*. 2020;(August 3):19-21.
9. Eyre DW, Lumley SF, O'donnell D, et al. Differential occupational risks to healthcare workers from SARS-CoV-2 observed during a prospective observational study. *Elife*. 2020;9:1-37. doi:10.7554/ELIFE.60675

10. Galanis P, Vraka I, Fragkou D, Bilali A, Kaitelidou D. Seroprevalence of SARS-CoV-2 antibodies and associated factors in healthcare workers: a systematic review and meta-analysis. *J Hosp Infect.* 2020;108(November):120-134.
11. Sotgiu G, Barassi A, Miozzo M, et al. SARS-CoV-2 specific serological pattern in healthcare workers of an Italian COVID-19 forefront hospital. *BMC Pulm Med.* 2020;20(1):1-6. doi:10.1186/s12890-020-01237-0
12. Hunter E, Price DA, Murphy E, et al. First experience of COVID-19 screening of healthcare workers in England. *Lancet.* 2020;395(10234):e77-e78. doi:10.1016/S0140-6736(20)30970-3
13. Chou R, Dana T, Buckley DI, Selph S, Fu R, Totten AM. Epidemiology of and Risk Factors for Coronavirus Infection in Health Care Workers: A Living Rapid Review. *Ann Intern Med.* 2020;173(2):120-136. doi:10.7326/M20-1632
14. Martin C, Montesinos I, Dauby N. Dynamics of SARS-CoV-2 RT-PCR positivity and seroprevalence among high-risk healthcare workers and hospital staff. *J Hosp Infect.* 2020;106(June):19-20.
15. de Lusignan S, Dorward J, Correa A, et al. Risk factors for SARS-CoV-2 among patients in the Oxford Royal College of General Practitioners Research and Surveillance Centre primary care network: a cross-sectional study. *Lancet Infect Dis.* 2020;20(9):1034-1042. doi:10.1016/S1473-3099(20)30371-6
16. *Statistics South Africa (2016) Provincial Profile: Eastern Cape Community Survey 2016.*; 2016. www.statssa.gov.za.
17. Bham A, Bhimam J, Bongweni F, Blumberg L, Cohen C, Erasmus L. *Clinical Management of Suspected or Confirmed COVID-19 Disease.* Vol 5.; 2020. [https://www.nicd.ac.za/wp-content/uploads/2020/07/NICD\\_DoH-COVID-19-Guidelines\\_Final\\_3-Jul-2020.pdf](https://www.nicd.ac.za/wp-content/uploads/2020/07/NICD_DoH-COVID-19-Guidelines_Final_3-Jul-2020.pdf).
18. Assay I, Boise S, Mathias PC, Greninger L. Performance Characteristics of the Abbott Architect SARS-CoV-2 IgG Assay and Seroprevalence in Boise, Idaho. *J Clin Micro.* 2020;58(8):4-11.
19. Guan W, Ni Z, Hu Y. Clinical characteristics of coronavirus disease 2019 in China. *NEJM.* 2020;382(18):1708-1720.
20. Gomez-Ochoa S, Franco O, Rojas L. COVID-19 in Healthcare Workers: A Living Systematic Review and Meta-analysis of Prevalence, Risk Factors, Clinical Characteristics, and outcomes. *Am J Epidemiol.* 2021;190(1):161-175.
21. Lumley S, Wei J, O'Donnell D. The duration, dynamics and determinants of SARS-

- 1  
2  
3 CoV-2 antibody responses in individual healthcare workers. *Clin Infect Dis*. 2021.  
4 doi:doi:10.1093/cid/ciab004  
5  
6  
7 22. Arevalo-Rodriguez I, Buitrago-Garcia D, Simancas-Racines D, et al. False-negative  
8 results of initial RT-PCR assays for COVID-19: A systematic review. *PLoS One*.  
9 2020;15(12 December):1-19. doi:10.1371/journal.pone.0242958  
10  
11  
12 23. Mallett S, Allen AJ, Graziadio S, et al. At what times during infection is SARS-CoV-2  
13 detectable and no longer detectable using RT-PCR-based tests? A systematic review of  
14 individual participant data. *BMC Med*. 2020;18(1):1-17. doi:10.1186/s12916-020-  
15 01810-8  
16  
17  
18 24. Ngai Yung Tsang N, Chi So H, Ya Ng K, Cowling B. Diagnostic performance of  
19 different sampling approaches for SARS-CoV-2 RT-PCR testing: a systematic review  
20 and meta-analysis. *Lancet Infect Dis*. 2021;21(April):1233-1245.  
21  
22  
23 25. Sykes W, Mhlanga L, Swanevelder R, et al. *Prevalence of Anti-SARS-CoV-2 Antibodies*  
24 *among Blood Donors in Northern Cape, KwaZulu-Natal, Eastern Cape, and Free State*  
25 *Provinces of South Africa in January 2021.*; 2021. doi:10.21203/rs.3.rs-233375/v1  
26  
27  
28 26. Popkin BM, Du S, Green WD, et al. Individuals with obesity and COVID-19: A global  
29 perspective on the epidemiology and biological relationships. *Obes Rev*. 2020;21(11):1-  
30 17. doi:10.1111/obr.13128  
31  
32  
33 27. Goossens GH, Dicker D, Farpour-Lambert NJ, et al. Obesity and COVID-19: A  
34 Perspective from the European Association for the Study of Obesity on Immunological  
35 Perturbations, Therapeutic Challenges, and Opportunities in Obesity. *Obes Facts*.  
36 2020;13(4):439-452. doi:10.1159/000510719  
37  
38  
39 28. de Frel DL, Atsma DE, Pijl H, et al. The impact of obesity and lifestyle on the immune  
40 system and susceptibility to infections such as COVID-19. *Front Nutr*. 2020;(7):279.  
41  
42  
43 29. Ssentongo P, Heilbrunn ES, Ssentongo AE, et al. Epidemiology and outcomes of  
44 COVID-19 in HIV-infected individuals: a systematic review and meta-analysis. *Sci Rep*.  
45 2021;11(1):1-12. doi:10.1038/s41598-021-85359-3  
46  
47  
48 30. Shisana O, Rehle T, Simbayi L, Zuma K, Jooste, S, Zungu N, Labadarios, D, Onoya D  
49 et al. *South African National HIV Prevalence, Incidence and Behaviour Survey, 2012*.  
50 Cape Town; 2014. www.hsrepress.ac.za.  
51  
52  
53  
54  
55  
56  
57  
58  
59  
60

**Table 1: Baseline characteristics of the participants (n = 1,295)**

| Variable                                             | Frequency | Percentage |
|------------------------------------------------------|-----------|------------|
| <b>Sex</b>                                           |           |            |
| Males                                                | 240       | 18.5       |
| Females                                              | 1055      | 81.5       |
| <b>Age (years)</b>                                   |           |            |
| 18-25                                                | 71        | 5.49       |
| 26-35                                                | 325       | 25.12      |
| 36-45                                                | 349       | 26.97      |
| 46-55                                                | 346       | 26.74      |
| >55                                                  | 203       | 15.69      |
| <b>*Race</b>                                         |           |            |
| Black                                                | 1019      | 78.7       |
| White                                                | 114       | 8.8        |
| Coloured                                             | 98        | 7.6        |
| Others                                               | 53        | 4.1        |
| <b>Level of Education</b>                            |           |            |
| Tertiary                                             | 925       | 71.5       |
| Secondary                                            | 357       | 27.6       |
| Primary                                              | 12        | 0.9        |
| <b>Smoking Status</b>                                |           |            |
| Never smoked                                         | 1178      | 91.0       |
| Active smoker                                        | 72        | 5.6        |
| Former smoker                                        | 44        | 3.4        |
| <b>Profession</b>                                    |           |            |
| Medical doctors                                      | 176       | 13.6       |
| Pharmacy staff                                       | 61        | 4.7        |
| Nurses                                               | 580       | 44.8       |
| Allied staff                                         | 105       | 8.1        |
| Support staff                                        | 372       | 28.8       |
| <b>Direct contact with a confirmed COVID-19 case</b> |           |            |
| Yes                                                  | 998       | 77.1       |
| No                                                   | 296       | 22.9       |
| <b>Attended PPE training</b>                         |           |            |
| Yes                                                  | 1027      | 79.4       |
| No                                                   | 267       | 20.6       |

\*n = 10 participants did not indicate their race group

PPE = Personal protective equipment

**Table 2. Confirmation of SARS-CoV-2 infection among the participants**

| Variables    | IgG Positive (n; %) | IgG Negative (n; %) | Total (n; %) |
|--------------|---------------------|---------------------|--------------|
| PCR Positive | 267 (68.5)          | 123 (31.5)          | 390 (30.1)   |
| PCR Negative | 146 (22.8)          | 494 (77.2)          | 640 (49.5)   |
| Never tested | 75 (28.4)           | 189 (71.6)          | 264 (20.4)   |
| Total        | 488 (37.7)          | 806 (62.3)          | 1294 (100)   |

IgG = Immunoglobulin G; PCR = Polymerase chain reaction; SARS-CoV-2 = Severe acute respiratory syndrome coronavirus-2

For peer review only

**Table 3. Relationship between socio-demographic characteristics and SARS-CoV-2 by Pearson  $\chi^2$  test**

| Variable                                             | SARS-CoV-2 by PCR and/or IgG |                | p-values         |
|------------------------------------------------------|------------------------------|----------------|------------------|
|                                                      | Yes (%)                      | No (%)         |                  |
| <b>All</b>                                           | n = 611 (47.2)               | n = 683 (52.8) |                  |
| <b>Sex</b>                                           |                              |                | <b>0.007</b>     |
| Males                                                | 95 (39.6)                    | 145 (60.4)     |                  |
| Females                                              | 517 (49.0)                   | 538 (51.0)     |                  |
| <b>Age</b>                                           |                              |                | 0.628            |
| <45 years                                            | 347 (46.6)                   | 397 (53.4)     |                  |
| >45 years                                            | 346 (54.7)                   | 286 (45.3)     |                  |
| <b>Race</b>                                          |                              |                | <b>&lt;0.001</b> |
| Black                                                | 524 (51.4)                   | 495 (48.6)     |                  |
| White                                                | 30 (26.3)                    | 84 (73.7)      |                  |
| Coloured                                             | 29 (29.6)                    | 69 (70.4)      |                  |
| Others                                               | 18 (34.0)                    | 35 (66.0)      |                  |
| <b>Level of Education</b>                            |                              |                | <b>0.003</b>     |
| Tertiary                                             | 418 (45.2)                   | 507 (54.8)     |                  |
| Secondary                                            | 191 (53.5)                   | 166 (46.5)     |                  |
| Primary                                              | 02 (16.7)                    | 10 (83.3)      |                  |
| <b>Smoking Status</b>                                |                              |                | <b>&lt;0.001</b> |
| Never smoked                                         | 580 (49.2)                   | 598 (50.8)     |                  |
| Active smoker                                        | 17 (23.6)                    | 55 (76.4)      |                  |
| Former smoker                                        | 14 (31.8)                    | 30 (68.2)      |                  |
| <b>Covid-19 exposure by Ward</b>                     |                              |                | <b>0.008</b>     |
| High risk                                            | 151 (51.2)                   | 144 (48.8)     |                  |
| Medium risk                                          | 265 (42.7)                   | 355 (57.3)     |                  |
| Low risk                                             | 195 (51.5)                   | 184 (48.6)     |                  |
| <b>Profession</b>                                    |                              |                | <b>&lt;0.001</b> |
| Medical doctors                                      | 55 (31.2)                    | 121 (68.8)     |                  |
| Pharmacy staff                                       | 28 (45.9)                    | 33 (54.1)      |                  |
| Nurses                                               | 311 (53.6)                   | 269 (46.4)     |                  |
| Allied staff                                         | 25 (23.8)                    | 80 (76.2)      |                  |
| Support staff                                        | 192 (51.6)                   | 180 (48.4)     |                  |
| <b>Direct contact with a confirmed COVID-19 case</b> |                              |                | 0.337            |
| Yes                                                  | 464 (46.5)                   | 534 (53.5)     |                  |
| No                                                   | 147 (49.7)                   | 149 (50.3)     |                  |
| <b>Attended PPE training</b>                         |                              |                | 0.498            |
| Yes                                                  | 480 (46.7)                   | 547 (53.3)     |                  |
| No                                                   | 131 (49.1)                   | 136 (50.9)     |                  |

IgG = Immunoglobulin G; PCR = Polymerase chain reaction; PPE = Personal protective equipment; SARS-CoV-2 = Severe acute respiratory syndrome coronavirus-2.

Support staff = Administration/Management staff (51/98; 52.0%), General workers (31/61; 50.8%), Kitchen staff (23/33; 69.7%), Porters (06/15; 40.0%), Stores/Sales staff (0/5), Mortuary staff (4/5; 80.0%), Laundry staff (23/39; 59.0%). \*117 of the support staff did not indicate their duties.

Allied Workers = Radiology staff (9/37; 24.3%), Social workers (1), Physiotherapists (1), Dieticians (1), \*68 of allied workers did not indicate their duties.

**Table 4: Relationship between co-morbidities and SARS-CoV-2 by Pearson  $\chi^2$  test**

| Variables                     | Positive SARS-CoV-2 PCR and/ or IgG |                | p-values         |
|-------------------------------|-------------------------------------|----------------|------------------|
|                               | Yes (%)                             | No (%)         |                  |
| <b>All</b>                    | n = 611 (47.2)                      | n = 683 (52.8) |                  |
| <b>*BMI</b>                   |                                     |                | <b>&lt;0.001</b> |
| Underweight                   | 4 (57.1)                            | 3 (42.9)       |                  |
| Normal weight                 | 47 (26.7)                           | 129 (73.3)     |                  |
| Overweight                    | 121 (41.4)                          | 171 (58.6)     |                  |
| Obese                         | 434 (53.5)                          | 378 (46.6)     |                  |
| <b>Diabetes</b>               |                                     |                | 0.076            |
| Yes                           | 56 (54.4)                           | 47 (45.6)      |                  |
| No                            | 555 (46.6)                          | 636 (53.4)     |                  |
| <b>Hypertension</b>           |                                     |                | 0.246            |
| Yes                           | 119 (50.6)                          | 116 (49.4)     |                  |
| No                            | 492 (46.5)                          | 567 (53.5)     |                  |
| <b>HIV</b>                    |                                     |                | 0.300            |
| Yes                           | 40 (42.1)                           | 55 (57.9)      |                  |
| No                            | 571 (47.6)                          | 628 (52.4)     |                  |
| <b>TB</b>                     |                                     |                | 0.141            |
| Yes                           | 11 (34.4)                           | 21 (65.6)      |                  |
| No                            | 600 (47.5)                          | 662 (52.5)     |                  |
| <b>Chronic Kidney Disease</b> |                                     |                | 0.074            |
| Yes                           | 07 (29.2)                           | 17 (70.8)      |                  |
| No                            | 604 (47.6)                          | 666 (52.4)     |                  |
| <b>Heart Disease</b>          |                                     |                | 0.496            |
| Yes                           | 15 (53.6)                           | 13 (46.4)      |                  |
| No                            | 596 (47.1)                          | 670 (52.9)     |                  |
| <b>Asthma/COPD</b>            |                                     |                | 0.143            |
| Yes                           | 31 (39.2)                           | 48 (60.8)      |                  |
| No                            | 580 (47.7)                          | 635 (52.3)     |                  |
| <b>Liver Disease</b>          |                                     |                | 0.169            |
| Yes                           | 06 (31.6)                           | 13 (68.4)      |                  |
| No                            | 605 (47.5)                          | 670 (52.6)     |                  |
| <b>Cancer</b>                 |                                     |                | 0.515            |
| Yes                           | 8 (40.0)                            | 12 (60.0)      |                  |
| No                            | 603 (47.3)                          | 671 (52.7)     |                  |

BMI = Body mass index; IgG = Immunoglobulin G; TB = Tuberculosis; SARS-CoV-2 = Severe acute respiratory syndrome coronavirus-2; COPD = Chronic obstructive pulmonary disease.

**Table 5. Adjusted and unadjusted logistic regression model showing risk factors for SARS-CoV-2 infection among HCWs**

| Variables                                            | UOR (95%CI)       | p-value          | AOR (95%CI)       | p-value          |
|------------------------------------------------------|-------------------|------------------|-------------------|------------------|
| <b>Sex</b>                                           |                   |                  |                   |                  |
| Males                                                | Ref               |                  | Ref               |                  |
| Females                                              | 1.48 (1.11-1.79)  | <b>0.007</b>     | 1.09 (0.78-1.51)  | 0.595            |
| <b>Race</b>                                          |                   |                  |                   |                  |
| Others                                               | Ref               |                  | Ref               |                  |
| Coloured                                             | 0.48 (0.27-0.86)  | <b>0.015</b>     | 1.06 (0.55-2.06)  | 0.848            |
| White                                                | 1.44 (0.71-2.91)  | 0.311            | 1.46 (0.69-3.07)  | 0.313            |
| Black                                                | 0.91 (0.91-1.81)  | 0.789            | 1.28 (0.61-2.71)  | 0.504            |
| <b>Level of Education</b>                            |                   |                  |                   |                  |
| Tertiary                                             | Ref               |                  | Ref               |                  |
| Secondary                                            | 4.12 (0.89-18.91) | 0.068            | 3.05 (0.62-14.85) | 0.166            |
| Primary                                              | 0.71 (0.56-0.91)  | <b>0.008</b>     | 0.90 (0.67-1.22)  | 0.509            |
| <b>Smoking Status</b>                                |                   |                  |                   |                  |
| Never smoked                                         | Ref               |                  | Ref               |                  |
| Active smoker                                        | 0.48 (0.25-0.91)  | <b>0.026</b>     | 0.65 (0.32-1.29)  | 0.222            |
| Former smoker                                        | 1.51 (0.65-3.48)  | 0.334            | 1.77 (0.73-4.25)  | 0.199            |
| <b>Profession</b>                                    |                   |                  |                   |                  |
| Support staff                                        | Ref               |                  | Ref               |                  |
| Allied staff                                         | 2.34 (1.60-3.42)  | <b>&lt;0.001</b> | 1.92 (0.83-4.43)  | 0.124            |
| Nurses                                               | 1.25 (0.73-2.16)  | 0.409            | 0.84 (0.35-1.99)  | 0.693            |
| Pharmacy staff                                       | 0.93 (0.71-1.19)  | 0.545            | 0.88 (0.42-1.84)  | 0.747            |
| Medical doctors                                      | 3.41 (2.08-5.58)  | <b>&lt;0.001</b> | 1.52 (0.67-3.45)  | 0.316            |
| <b>COVID-19 Exposure by Ward</b>                     |                   |                  |                   |                  |
| Low risk                                             | Ref               |                  | Ref               |                  |
| Medium risk                                          | 0.69 (0.53-0.90)  | 0.006            | 1.19 (0.59-2.41)  | 0.749            |
| High risk                                            | 0.97 (0.71-1.32)  | 0.883            | 0.88 (0.42-1.86)  | 0.611            |
| <b>Direct contact with a confirmed COVID-19 case</b> |                   |                  |                   |                  |
| No                                                   | Ref               |                  | Ref               |                  |
| Yes                                                  | 0.88 (0.67-1.14)  | 0.338            | 1.01 (0.75-1.36)  | 0.928            |
| <b>Attended PPE training</b>                         |                   |                  |                   |                  |
| Yes                                                  | Ref               |                  | Ref               |                  |
| No                                                   | 1.09 (0.83-1.42)  | 0.498            | 0.99 (0.74-1.33)  | 0.996            |
| <b>Use of public transport</b>                       |                   |                  |                   |                  |
| No                                                   | Ref               |                  | Ref               |                  |
| Yes                                                  | 0.63 (0.51-0.79)  | <b>&lt;0.001</b> | 0.94 (0.69-1.17)  | 0.444            |
| <b>BMI</b>                                           |                   |                  |                   |                  |
| Underweight                                          | -                 |                  | -                 |                  |
| Normal                                               | Ref               |                  | Ref               |                  |
| Overweight                                           | 3.15 (2.19-4.53)  | <b>&lt;0.001</b> | 2.15 (1.44-3.20)  | <b>&lt;0.001</b> |
| Obese                                                | 1.62 (1.23-2.12)  | <b>&lt;0.001</b> | 1.37 (1.02-1.85)  | <b>0.033</b>     |
| <b>Diabetes</b>                                      |                   |                  |                   |                  |
| No                                                   | Ref               |                  | Ref               |                  |
| Yes                                                  | 0.73 (0.48-1.09)  | 0.131            | 0.85 (0.55-1.32)  | 0.480            |
| <b>Hypertension</b>                                  |                   |                  |                   |                  |
| No                                                   | Ref               |                  | Ref               |                  |
| Yes                                                  | 0.84 (0.63-1.12)  | 0.246            | 1.08 (0.78-1.48)  | 0.628            |
| <b>HIV</b>                                           |                   |                  |                   |                  |
| No                                                   | Ref               |                  | Ref               |                  |
| Yes                                                  | 1.25 (0.81-1.19)  | 0.301            | 1.78 (1.38-2.08)  | <b>0.012</b>     |

BMI = Body mass index; HCWs = Healthcare workers; PPE = Personal protective equipment; SARS-CoV-2 = Severe acute respiratory syndrome coronavirus-2; UOR = Unadjusted odds ratio; AOR = Adjusted odds ratio



**STROBE 2007 (v4) Statement—Checklist of items that should be included in reports of *cross-sectional studies***

| Section/Topic                | Item # | Recommendation                                                                                                                                                                       | Reported on page # |
|------------------------------|--------|--------------------------------------------------------------------------------------------------------------------------------------------------------------------------------------|--------------------|
| <b>Title and abstract</b>    | 1      | (a) Indicate the study’s design with a commonly used term in the title or the abstract                                                                                               | 2                  |
|                              |        | (b) Provide in the abstract an informative and balanced summary of what was done and what was found                                                                                  | 2                  |
| <b>Introduction</b>          |        |                                                                                                                                                                                      |                    |
| Background/rationale         | 2      | Explain the scientific background and rationale for the investigation being reported                                                                                                 | 3                  |
| Objectives                   | 3      | State specific objectives, including any prespecified hypotheses                                                                                                                     | 5                  |
| <b>Methods</b>               |        |                                                                                                                                                                                      |                    |
| Study design                 | 4      | Present key elements of study design early in the paper                                                                                                                              | 5                  |
| Setting                      | 5      | Describe the setting, locations, and relevant dates, including periods of recruitment, exposure, follow-up, and data collection                                                      | 5                  |
| Participants                 | 6      | (a) Give the eligibility criteria, and the sources and methods of selection of participants                                                                                          | 6                  |
| Variables                    | 7      | Clearly define all outcomes, exposures, predictors, potential confounders, and effect modifiers. Give diagnostic criteria, if applicable                                             | 7                  |
| Data sources/<br>measurement | 8*     | For each variable of interest, give sources of data and details of methods of assessment (measurement). Describe comparability of assessment methods if there is more than one group | 7                  |
| Bias                         | 9      | Describe any efforts to address potential sources of bias                                                                                                                            | 6                  |
| Study size                   | 10     | Explain how the study size was arrived at                                                                                                                                            | 6                  |
| Quantitative variables       | 11     | Explain how quantitative variables were handled in the analyses. If applicable, describe which groupings were chosen and why                                                         | 7                  |
| Statistical methods          | 12     | (a) Describe all statistical methods, including those used to control for confounding                                                                                                | 8                  |
|                              |        | (b) Describe any methods used to examine subgroups and interactions                                                                                                                  | 8                  |
|                              |        | (c) Explain how missing data were addressed                                                                                                                                          | 9                  |
|                              |        | (d) If applicable, describe analytical methods taking account of sampling strategy                                                                                                   |                    |
|                              |        | (e) Describe any sensitivity analyses                                                                                                                                                |                    |
| <b>Results</b>               |        |                                                                                                                                                                                      |                    |

|                          |     |                                                                                                                                                                                                                                                                                                                                                                                                               |    |
|--------------------------|-----|---------------------------------------------------------------------------------------------------------------------------------------------------------------------------------------------------------------------------------------------------------------------------------------------------------------------------------------------------------------------------------------------------------------|----|
| Participants             | 13* | (a) Report numbers of individuals at each stage of study—eg numbers potentially eligible, examined for eligibility, confirmed eligible, included in the study, completing follow-up, and analysed<br>(b) Give reasons for non-participation at each stage<br>(c) Consider use of a flow diagram                                                                                                               | 9  |
| Descriptive data         | 14* | (a) Give characteristics of study participants (eg demographic, clinical, social) and information on exposures and potential confounders<br>(b) Indicate number of participants with missing data for each variable of interest                                                                                                                                                                               | 9  |
| Outcome data             | 15* | Report numbers of outcome events or summary measures                                                                                                                                                                                                                                                                                                                                                          | 10 |
| Main results             | 16  | (a) Give unadjusted estimates and, if applicable, confounder-adjusted estimates and their precision (eg, 95% confidence interval). Make clear which confounders were adjusted for and why they were included<br>(b) Report category boundaries when continuous variables were categorized<br>(c) If relevant, consider translating estimates of relative risk into absolute risk for a meaningful time period | 10 |
| Other analyses           | 17  | Report other analyses done—eg analyses of subgroups and interactions, and sensitivity analyses                                                                                                                                                                                                                                                                                                                | 10 |
| <b>Discussion</b>        |     |                                                                                                                                                                                                                                                                                                                                                                                                               |    |
| Key results              | 18  | Summarise key results with reference to study objectives                                                                                                                                                                                                                                                                                                                                                      | 10 |
| Limitations              | 19  | Discuss limitations of the study, taking into account sources of potential bias or imprecision. Discuss both direction and magnitude of any potential bias                                                                                                                                                                                                                                                    | 12 |
| Interpretation           | 20  | Give a cautious overall interpretation of results considering objectives, limitations, multiplicity of analyses, results from similar studies, and other relevant evidence                                                                                                                                                                                                                                    | 14 |
| Generalisability         | 21  | Discuss the generalisability (external validity) of the study results                                                                                                                                                                                                                                                                                                                                         |    |
| <b>Other information</b> |     |                                                                                                                                                                                                                                                                                                                                                                                                               |    |
| Funding                  | 22  | Give the source of funding and the role of the funders for the present study and, if applicable, for the original study on which the present article is based                                                                                                                                                                                                                                                 | 3  |

\*Give information separately for cases and controls in case-control studies and, if applicable, for exposed and unexposed groups in cohort and cross-sectional studies.

**Note:** An Explanation and Elaboration article discusses each checklist item and gives methodological background and published examples of transparent reporting. The STROBE checklist is best used in conjunction with this article (freely available on the Web sites of PLoS Medicine at <http://www.plosmedicine.org/>, Annals of Internal Medicine at <http://www.annals.org/>, and Epidemiology at <http://www.epidem.com/>). Information on the STROBE Initiative is available at [www.strobe-statement.org](http://www.strobe-statement.org).

# BMJ Open

## Cumulative incidence of SARS-CoV-2 and associated risk factors among healthcare workers - a cross-sectional study in the Eastern Cape, South Africa

|                                 |                                                                                                                                                                                                                                                                                                                                                                                                                                                                                                                                                                                                                                                                                                                                                                                                                                                                      |
|---------------------------------|----------------------------------------------------------------------------------------------------------------------------------------------------------------------------------------------------------------------------------------------------------------------------------------------------------------------------------------------------------------------------------------------------------------------------------------------------------------------------------------------------------------------------------------------------------------------------------------------------------------------------------------------------------------------------------------------------------------------------------------------------------------------------------------------------------------------------------------------------------------------|
| Journal:                        | <i>BMJ Open</i>                                                                                                                                                                                                                                                                                                                                                                                                                                                                                                                                                                                                                                                                                                                                                                                                                                                      |
| Manuscript ID                   | bmjopen-2021-058761.R1                                                                                                                                                                                                                                                                                                                                                                                                                                                                                                                                                                                                                                                                                                                                                                                                                                               |
| Article Type:                   | Original research                                                                                                                                                                                                                                                                                                                                                                                                                                                                                                                                                                                                                                                                                                                                                                                                                                                    |
| Date Submitted by the Author:   | 23-Feb-2022                                                                                                                                                                                                                                                                                                                                                                                                                                                                                                                                                                                                                                                                                                                                                                                                                                                          |
| Complete List of Authors:       | Stead, David; Walter Sisulu University Faculty of Health Sciences, Department of Internal Medicine; Frere Hospital, Internal Medicine<br>ADENIYI, OLADELE VINCENT; Walter Sisulu University Faculty of Health Sciences, Department of Family Medicine; Cecilia Makiwane Hospital, Department of Family Medicine<br>Singata-Madliki, Mandisa; University of Fort Hare East London Campus, Department of Public health; Wits University, Obstetrics and gynaecology<br>Abrahams, Shareef; National Health Laboratory Service, Division of Microbiology, Department of Pathology<br>Batting, Joanne; University of Fort Hare East London Campus, Department of Public health<br>Jelliman, Eloise; Frere Hospital, Radiology<br>Parrish, Andrew; Walter Sisulu University Faculty of Health Sciences, Internal Medicine; Frere Hospital, Department of Internal Medicine |
| <b>Primary Subject Heading</b>: | Infectious diseases                                                                                                                                                                                                                                                                                                                                                                                                                                                                                                                                                                                                                                                                                                                                                                                                                                                  |
| Secondary Subject Heading:      | Public health, Occupational and environmental medicine                                                                                                                                                                                                                                                                                                                                                                                                                                                                                                                                                                                                                                                                                                                                                                                                               |
| Keywords:                       | COVID-19, Infection control < INFECTIOUS DISEASES, Health & safety < HEALTH SERVICES ADMINISTRATION & MANAGEMENT                                                                                                                                                                                                                                                                                                                                                                                                                                                                                                                                                                                                                                                                                                                                                     |
|                                 |                                                                                                                                                                                                                                                                                                                                                                                                                                                                                                                                                                                                                                                                                                                                                                                                                                                                      |

SCHOLARONE™  
Manuscripts



I, the Submitting Author has the right to grant and does grant on behalf of all authors of the Work (as defined in the below author licence), an exclusive licence and/or a non-exclusive licence for contributions from authors who are: i) UK Crown employees; ii) where BMJ has agreed a CC-BY licence shall apply, and/or iii) in accordance with the terms applicable for US Federal Government officers or employees acting as part of their official duties; on a worldwide, perpetual, irrevocable, royalty-free basis to BMJ Publishing Group Ltd ("BMJ") its licensees and where the relevant Journal is co-owned by BMJ to the co-owners of the Journal, to publish the Work in this journal and any other BMJ products and to exploit all rights, as set out in our [licence](#).

The Submitting Author accepts and understands that any supply made under these terms is made by BMJ to the Submitting Author unless you are acting as an employee on behalf of your employer or a postgraduate student of an affiliated institution which is paying any applicable article publishing charge ("APC") for Open Access articles. Where the Submitting Author wishes to make the Work available on an Open Access basis (and intends to pay the relevant APC), the terms of reuse of such Open Access shall be governed by a Creative Commons licence – details of these licences and which [Creative Commons](#) licence will apply to this Work are set out in our licence referred to above.

Other than as permitted in any relevant BMJ Author's Self Archiving Policies, I confirm this Work has not been accepted for publication elsewhere, is not being considered for publication elsewhere and does not duplicate material already published. I confirm all authors consent to publication of this Work and authorise the granting of this licence.

1  
2  
3  
4  
5  
6  
7  
8  
9  
10  
11  
12  
13  
14  
15  
16  
17  
18  
19  
20  
21  
22  
23  
24  
25  
26  
27  
28  
29  
30  
31  
32  
33  
34  
35  
36  
37  
38  
39  
40  
41  
42  
43  
44  
45  
46  
47  
48  
49  
50  
51  
52  
53  
54  
55  
56  
57  
58  
59  
60

**Cumulative incidence of SARS-CoV-2 and associated risk factors among  
healthcare workers – a cross-sectional study in the Eastern Cape, South Africa**

\*David Stead<sup>1,2</sup>, Oladele Vincent Adeniyi<sup>3,4</sup>, Mandisa Singata-Madliki<sup>5,6</sup>, Shareef Abrahams<sup>7</sup>  
Joanne Batting<sup>5</sup>, Eloise Jelliman<sup>8</sup>, and Andrew Parrish<sup>1,2</sup>

**Affiliations:**

1. Department of Internal Medicine, Frere Hospital, East London, South Africa.
2. Department of Internal Medicine, Faculty of Health sciences, Walter Sisulu University, Mthatha, South Africa.
3. Department of Family Medicine, Cecilia Makiwane Hospital, East London, South Africa.
4. Department of Family Medicine, Faculty of Health sciences, Walter Sisulu University, Mthatha.
5. Effective Care Research Unit, Department of Public Health, University of Fort Hare, East London, South Africa.
6. Department of Obstetrics and Gynaecology, Wits University, Johannesburg, South Africa.
7. Division of Medical Microbiology, Department of Pathology, National Health Laboratory Service, Port Elizabeth, South Africa.
8. Department of Radiology, Frere Hospital, East London, South Africa.

**\*Corresponding Author:**

Dr David F. Stead, (MChB, FCP, Cert. Infectious diseases, MPhil)

Department of Internal Medicine,

Frere Hospital

East London, South Africa.

Email: [dfstead@gmail.com](mailto:dfstead@gmail.com)

## Abstract

**Objectives:** This study assesses the cumulative incidence of SARS-CoV-2 infection among healthcare workers (HCWs) during South Africa's first wave and examines the associated demographic, health-related, and occupational risk factors for infection.

**Methods:** Multi-stage cluster sampling was used in a cross-sectional study to recruit 1,309 HCWs from two academic hospitals in the Eastern Cape, South Africa over six weeks in November and December 2020. Prior test results for SARS-CoV-2 polymerase chain reaction (PCR) and participants' characteristics were recorded while a blood sample was drawn for detection of IgG antibodies against SARS-CoV-2 nucleocapsid protein. The primary outcome measure was the SARS-CoV-2 cumulative incidence rate, defined as the combined total of positive results for either PCR or IgG antibodies, divided by the total sample. The secondary outcome was significant risk factors associated with infection.

**Results:** Of the total participants included in the analysis (n=1295), the majority were female (81.5%), of black race (78.7%) and nurses (44.8%). A total of 390 (30.1%) HCWs had a positive SARS-CoV-2 PCR result and SARS-CoV-2 antibodies were detected in 488 (37.7%), yielding a cumulative incidence of 47.2% (n = 611). In the adjusted logistic regression model, being overweight (Adjusted odds ratio (AOR) = 2.15, 95% CI 1.44-3.20), obese (AOR = 1.37, 95% CI 1.02-1.85) and living with HIV (AOR = 1.78, 95% CI 1.38-2.08) were independently associated with SARS-CoV-2 infection. There was no significant difference in infection rates between high, medium and low COVID-19 exposure working environments.

**Conclusions:** The high SARS-CoV-2 cumulative incidence in the cohort was surprising this early in the epidemic and probably related to exposure both in and outside the hospitals. To mitigate the impact of SARS-CoV-2 among HCWs, infection prevention and control (IPC) strategies should target community transmission in addition to screening for HIV and metabolic conditions.

### Strengths and limitations of this study:

- This is a large representative sample of the total workforce of the two hospitals, with a good spectrum of staff category.
- Combining the historical SARS-CoV-2 PCR results with the Nucleocapsid IgG enabled capturing of some of the asymptomatic and missed SARS-CoV-2 infections.
- This is one of the first studies to look at SARS-CoV-2 infection risk factors in a high exposure environment in Africa.

- A limitation is that HIV ELISA and CD4 counts were not tested, but relied on self-report, which may likely underestimate the burden of HIV in the cohort.

**Funding statement:**

This work was supported by the South African Medical Research Council (SAMRC) Grant number: 0000062597106824, and the Walter Sisulu University Health Sciences Personal publications fund (No number applicable).

**Competing interests statement:**

The authors declare no conflict of interest.

**Keywords:** COVID-19, cumulative infection rate, Eastern Cape, healthcare workers, SARS-CoV-2

**Background**

South Africa reported its first imported case of SARS-CoV-2 on 5 March 2020 and subsequently experienced high rates of transmission throughout the country. The first wave peaked in July 2020, the second wave in late December 2020 and a third in June 2021, with total cases approaching 3 million.<sup>1</sup> The Eastern Cape ranked 4th out of South Africa's nine provinces for cumulative SARS-CoV-2 cases, with 290 898 cases recorded on 2 October 2021.<sup>1</sup>

Healthcare workers (HCWs) are responsible for providing acute in-hospital care for patients with moderate and severe COVID-19 who require oxygen support and other therapies.<sup>2</sup> The HCWs are exposed to infectious droplets and aerosols, putting them at increased risk for infection.<sup>2</sup> Despite infection prevention and control measures at the health facility level, HCWs still acquire SARS-CoV-2 at a higher rate than the general population.<sup>2-4</sup> A prospective study of 200 frontline HCWs in the United Kingdom (UK), during the first peak of viral transmission involving the collection of twice weekly nasopharyngeal swabs for reverse transcription polymerase chain reaction (RT-PCR) and monthly blood samples for serology, showed that 44% became infected. This was more than double the rate of the local population.<sup>3</sup> A smartphone application allowing self-reporting of positive SARS-CoV-2 PCR results was used in a survey of almost 100,000 UK and United States (US) HCWs. Incident cases in these HCWs were almost 12-fold greater than in a two million comparator sample of the general population.<sup>2</sup>

1  
2  
3 Another UK study found a SARS-CoV-2 seroprevalence of 16.3% among HCWs compared to  
4 a 5.9% national community rate.<sup>4</sup>  
5  
6  
7

8 Reported information on SARS-CoV-2 infections among HCWs in Africa is scanty. Two  
9 hundred and twenty-two HCWs from single South African paediatric unit were included in a  
10 global comparative seroprevalence study (recruited June to August 2020), with a seropositivity  
11 of 10.36% (95% CI: 7-15.07).<sup>5</sup> A pre-print of a serosurvey of 500 HCWs in Blantyre, Malawi,  
12 reported a 12.3% positivity rate.<sup>6</sup> The Eastern Cape Department of Health reported a total of  
13 11,262 HCWs infected with SARS-CoV-2 by 18 February 2021, with 262 deaths (2.3% fatality  
14 rate). The highest infection rates were among state-employed doctors and nurses (18.2% and  
15 22.3%, respectively) compared to a 2.8% for the province as a whole.<sup>7</sup>  
16  
17  
18  
19  
20  
21  
22  
23

24 The high SARS-CoV-2 exposure environment in hospitals enables the study of SARS-CoV-2  
25 transmission dynamics, and the efficacy of infection prevention and control measures. In some  
26 studies, high-exposure clinical areas such as Accident & Emergency Units, acute medical  
27 wards and intensive care units have been associated with increased HCW infections when  
28 compared to administrative or support service areas.<sup>8-10</sup> Others have shown no difference  
29 between staff roles, suggesting that most infections were acquired outside of areas of patient  
30 contact, or outside of the hospital.<sup>11,12</sup> Inadequate availability or faulty use of personal  
31 protective equipment (PPE) are both factors shown to increase the risk of infection.<sup>2,13</sup> Male  
32 HCWs and those with at least one comorbidity also appear to have an increased risk of  
33 acquiring SARS-CoV-2 infection.<sup>8,14</sup> Outside the healthcare environment, a study of 3,802  
34 SARS-CoV-2 tests performed in the UK found that infection risk was increased by male  
35 gender, age 40-64 years, black ethnicity, lower socio-economic status, chronic kidney disease,  
36 and obesity. In this study, smokers had a lower risk of infection.<sup>15</sup>  
37  
38  
39  
40  
41  
42  
43  
44  
45  
46  
47

48 SARS-CoV-2 is a global pandemic, but has affected individual countries and their health  
49 systems to varying degrees. Explanations for this include a complex interaction of population  
50 and genetic vulnerabilities, social mitigation behaviour, and health system interventions. Due  
51 to the paucity of evidence around the impact of SARS-CoV-2 on HCWs in Africa, this study  
52 was undertaken to gain insights in this setting. Frere and Cecilia Makiwane hospitals are  
53 situated in the Eastern Cape Province in South Africa. This is an under-resourced province  
54 with a relatively less robust healthcare system. Both facilities experienced high numbers of  
55 staff infections and absenteeism during the first wave of SARS-CoV-2, with considerable  
56  
57  
58  
59  
60



1  
2  
3 disruption to health service delivery. This study was conducted to assess the cumulative  
4 incidence of staff SARS-CoV-2 infections (symptomatic and asymptomatic), and their  
5 associated demographic, health-related, and occupational risk factors. Findings from the study  
6 may inform planning and improve IPC measures related to infections with SARS-CoV-2 and  
7 other respiratory viruses in the province.  
8  
9  
10  
11  
12

## 13 **Methods**

### 14 **Study design and settings**

15 This observational cross-sectional study was conducted in two academic hospitals: Frere and  
16 Cecilia Makiwane, in the central region of the Eastern Cape, South Africa. Cecilia Makiwane  
17 is a regional hospital that provides levels one and two healthcare services to the residents of  
18 Buffalo City and the Amathole district. Frere hospital is a tertiary institution which serves as a  
19 referral hospital for four district municipalities: Buffalo City, Amathole, Chris Hani and Joe  
20 Gqabi. Together they serve a population of almost three million residents and have over 4,000  
21 HCWs: doctors, nurses, pharmacists, allied workers and support staff (administration, laundry,  
22 kitchen and mortuary).<sup>16</sup>  
23  
24  
25  
26  
27  
28  
29  
30

### 31 **Re-organisation of hospitals during the ‘first wave’**

32 At the onset of the first wave, local protocols were developed in accordance with the National  
33 Institute of Communicable Diseases Guidelines for the management of confirmed or suspected  
34 cases of COVID-19.<sup>17</sup> Designated COVID-19 units were created from the existing emergency  
35 units of the two hospitals. All individuals meeting the criteria for ‘patient under investigation’  
36 and/or confirmed cases of COVID-19 were directed to the designated area within the  
37 emergency unit, where triaging and clinical evaluations were performed by the attending  
38 clinicians. Patients meeting the criteria for admission based on the severity of their condition  
39 and/or co-morbidities were admitted into designated COVID-19 wards. Patients who presented  
40 in critical condition were admitted into the hospitals’ intensive care units. All staff working in  
41 the designated COVID-19 wards and emergency units received training on the effective use of  
42 PPE. In addition, the hospitals formed logistics committees comprising senior managers of the  
43 hospital to ensure a constant supply of PPE for use by all personnel caring for patients with  
44 COVID-19. Health care workers were tested by SARS-CoV-2 PCR if they developed any  
45 attributable symptoms, or if they were judged to be close contacts of a known positive case.  
46 This was in accordance with the national guidelines.<sup>17</sup> The Occupational Health and Safety  
47 (OHS) unit of each hospital created a database of COVID-19 infection among its HCWs.  
48  
49  
50  
51  
52  
53  
54  
55  
56  
57  
58  
59  
60

1  
2  
3 HCWs were required to submit confirmation of a SARS-CoV-2 PCR positive result to proceed  
4 with the mandatory isolation of 10–14 days.  
5  
6  
7

## 8 **Participants**

9  
10 All categories of HCWs in the two hospitals were eligible to participate in the study. To ensure  
11 inclusivity of all HCWs, the study adopted a multi-stage cluster sampling technique. Risk  
12 profiles were categorised according to the exposure areas identified by Iversen et al.: ‘high  
13 risk’ if the HCWs worked in Accident & Emergency units, designated COVID-19 wards, and  
14 intensive care units (ICUs); ‘intermediate risk’ if HCWs worked in non-respiratory admission  
15 wards, outpatient departments (OPDs), and other clinical areas; and ‘low risk’ if the HCWs  
16 performed administrative tasks and other non-clinical duties.<sup>8</sup> Prior to recruitment, mass  
17 sensitisation about the study was conducted through union leaders, departmental heads and  
18 clinical managers, and a circulated communique. Each working area was allocated specific  
19 days to allow those on night shifts as well as those who were off-duty to participate. In addition,  
20 a central recruitment area was created in each of the two hospitals to cater for HCWs who  
21 might have missed the dates allocated by their departments. There was no sample size  
22 calculation performed, but rather as many staff recruited as possible within the time frame for  
23 the study. The study was implemented between 4 November and 18 December 2020. SARS-  
24 CoV-2 vaccination for HCWs in South Africa only became available in March 2021.  
25  
26  
27  
28  
29  
30  
31  
32  
33  
34  
35  
36  
37

## 38 **Procedure**

39 Each department/work area provided a dedicated station where HCWs completed a written  
40 questionnaire (included in supplementary material) and blood samples were drawn. Two  
41 research nurses and four assistants underwent training on the research process and study  
42 instrument over a three-day period prior to commencement. The research nurses measured  
43 HCWs’ height and weight according to standard protocols. Venous blood samples (about 5  
44 mL) were drawn by the trained research nurses using an aseptic technique. All blood samples  
45 were tested for the IgG antibodies against SARS-CoV-2 nucleocapsid protein by the National  
46 Health Laboratory Services in accordance with standard protocols.  
47  
48  
49  
50  
51  
52  
53  
54

55 To link the results of SARS-CoV-2 PCR tests recorded on the OHS databases with the SARS-  
56 CoV-2 IgG antibody tests, while maintaining confidentiality, a unique identifying number was  
57 used to encode the participants’ details (names, date of birth and area of work) in the research  
58 register, which was accessible only to the investigators. The questionnaire data for the study  
59  
60

1  
2  
3 were captured on the REDCap® online database of the South African Medical Research  
4 Council server.  
5  
6  
7

### 8 **Main outcome measures**

9  
10 Serum samples were analysed on an Abbott ARCHITECT i1000SR instrument using the  
11 Abbott SARS-CoV-2 IgG assay in accordance with the manufacturer's instructions. This is a  
12 chemiluminescent microparticle immunoassay (CMIA) for the qualitative detection of IgG  
13 against the SARS-CoV-2 nucleoprotein. Strength of response in relative light units reflects  
14 quantity of IgG present, and is compared to a calibrator to determine the calculated index  
15 (specimen/calibrator [S/C]) for a sample (with positive at 1.4 or greater). This assay has a  
16 specificity of 99.9% from 1020 pre-COVID-19 serum specimens and a sensitivity of 100% at  
17 17 days after symptom onset and 13 days after PCR positivity.<sup>18</sup>  
18  
19  
20  
21  
22  
23  
24  
25

26 Seropositivity was categorised as a binary outcome: a positive result of SARS-CoV-2 IgG was  
27 considered as evidence of prior infection (humoral immune response), while a negative result  
28 was considered as either non-exposure or as a decayed (lost) immune response.  
29

30 Cumulative incidence: This was a combination of a SARS-CoV-2 diagnosis (positive SARS-  
31 CoV-2 PCR and/or positive SARS-CoV-2 IgG).  
32

33 Missed SARS-CoV-2 infection: This was defined as seropositive SARS-CoV-2 IgG without  
34 any documented diagnosis of SARS-CoV-2. The latter included symptomatic individuals with  
35 negative SARS-CoV-2 PCR or who never tested and asymptomatic individuals who had not  
36 undergone PCR testing.  
37  
38  
39  
40  
41  
42

### 43 **Covariates**

44 Sociodemographic and clinical covariates were included in this study. Age, sex, race, highest  
45 level of education, profession and smoking status, among others, were self-reported in the  
46 questionnaire. Age was categorised by decades for the multivariate analysis. Exposure risks  
47 (such as direct contact with patients with COVID-19) and training on the use of PPE were also  
48 obtained. Certain comorbidities (diabetes, hypertension, HIV, Tuberculosis, Chronic kidney  
49 disease, heart disease, Asthma/Chronic obstructive pulmonary disease, liver disease, cancer,  
50 pregnancy) or immunosuppressive therapy, that have been shown to increase the risk of  
51 acquiring SARS-CoV-2 were explored in the questionnaire.<sup>2,8,13,15,19</sup> A prior SARS-CoV-2  
52 diagnosis was self-reported by the participants and validated through the OHS personnel  
53  
54  
55  
56  
57  
58  
59  
60

1  
2  
3 database in each hospital. The questionnaire was completed by each participant, with assistance  
4 offered to those participants requiring it.  
5  
6  
7

### 8 **Data analysis**

9  
10 Data were exported from the REDCap® online database for analysis using the IBM SPSS  
11 version 25.0 software (IBM SPSS, Chicago, Illinois) after cross-checking for completeness and  
12 accuracy. The means  $\pm$  standard deviations were estimated for continuous data and counts and  
13 proportions were estimated for categorical data for the sociodemographic characteristics of the  
14 participants. The proportion of HCWs with either a SARS-CoV-2 PCR diagnosis or positive  
15 IgG antibodies, or both, were reckoned as cumulative incidence in the study. The cumulative  
16 incidence was disaggregated by sociodemographic and clinical factors.  
17  
18  
19  
20  
21  
22  
23

24 The associations between the cumulative incidence and risk factors (sociodemographic and  
25 clinical) were explored using the Pearson  $\chi^2$  test. We fitted both unadjusted and adjusted multi-  
26 variate logistic regression models to examine the independent risk factors for cumulative  
27 infection with SARS-CoV-2 among the HCWs in the study. Variable selection in the model  
28 analysis was guided by known risk factors reported previously in other studies.<sup>8,13,15</sup> A p-value  
29 less than 0.05 was considered statistically significant.  
30  
31  
32  
33  
34  
35

### 36 **Ethical Considerations**

37 The Walter Sisulu University Ethics Committee granted approval for the implementation of  
38 the study (Reference: 087/2020), as well as the Eastern Cape Provincial Department of Health  
39 and local hospitals ethics committee. Each participant provided written informed consent for  
40 the study. Participants' rights to privacy and the confidentiality of clinical data were respected  
41 during and after the study. The research process followed the Helsinki Declaration and local  
42 institutional policy. All hard copies of materials used in the study were locked securely and  
43 soft copies were password-protected in the computer in the research office.  
44  
45  
46  
47  
48  
49  
50

### 51 **Patient and public involvement**

52 There was no public or patient involvement in the design, conduct or reporting of this research,  
53 as patients were not included. The healthcare worker participants were given their individual  
54 SARS-CoV-2 IgG results via cellular messaging. The main findings of the study will be shared  
55 with the respective hospital management teams.  
56  
57  
58  
59  
60

## Results

A total of 1,309 HCWs participated in the study from both hospitals, 656 from Frere Hospital and 653 from Cecilia Makiwane Hospital. Eleven blood samples for SARS-CoV-2 IgG serology were missing or rejected by the laboratory and were excluded from the final analysis. Data for another three participants were excluded due to missing data on the main outcome measures. Data for 1,295 HCWs were included in the final analysis.

### Baseline characteristics of the participants (n = 1,295)

The participants were predominantly women (81.5%), black (78.7%), had undergone tertiary education (71.5%), and most had never smoked (91.0%). In terms of professional category, nurses predominated (44.8%), followed by support staff (28.8%) and medical doctors (13.6%). Most (77.1%) participants reported direct contact with patients with COVID-19 and had attended training on PPE use (79.4%) (Table 1).

### SARS-CoV-2 cumulative incidence

SARS-CoV-2 infection was confirmed (PCR positive) in 390 participants (30.1%). Three hundred and forty-two (87.7%) of these reported at least 1 COVID-19 symptom at the time of testing, 38 (9.7%) were asymptomatic, and 10 (2.6%) had incomplete data. A positive SARS-CoV-2 IgG result occurred in 488 (37.7%) participants, giving a cumulative SARS-CoV-2 incidence of 47.2% (611 HCWs). Of the 390 PCR positive cases, 123 (31.5%) were SARS-CoV-2 IgG negative at the time of study, representing decay of IgG levels to below the testing threshold. This rate of humoral decay over time for this cohort was used to extrapolate the estimated true IgG positivity from the recorded 488 IgG positive, calculated at 712.8 (55.0%) estimated SARS-CoV-2 IgG positive at any time point. One hundred and forty-six of 640 (22.8%) PCR negative cases were IgG positive indicating potentially false negative PCR tests or being tested at the incorrect time. The SARS-CoV-2 IgG picked up an additional 17.1% (n = 221) missed infections in this cohort (146 HCWs with negative PCR results and 75 who never tested) (Table 2).

### Risk factors for SARS-CoV-2 infection among the HCWs

When examining sociodemographic and exposure risk factors for infection (Table 3), age, race, level of educational, smoking status, professional category, and work area were all significantly associated with SARS-CoV-2 infection ( $p < 0.05$ ). Among the co-morbid conditions (Table 4), only Body Mass Index (BMI) was significantly associated with SARS-CoV-2 infection.

In an unadjusted logistic regression analysis (Table 5), female sex, coloured ethnicity, a primary education, active smokers, medical doctors and allied staff, use of public transport, and being overweight and obese were significantly associated with SARS-CoV-2 infection. However, in the adjusted logistic regression (Table 5), comorbidity with HIV, and being overweight and obesity were independently associated with SARS-CoV-2 infection. Individuals who were living with HIV were almost twice as likely to be infected with SARS-CoV-2 (Adjusted Odd Ratio [AOR] = 1.78; 95% Confidence Interval [CI]: 1.38-2.08). Individuals who were overweight were twice as likely to be infected with SARS-CoV-2 (AOR = 2.15; 95% CI 1.44-3.20). Similarly, those who were obese were slightly more likely to be infected with SARS-CoV-2 (AOR = 1.37; 95% CI 1.02-1.85).

## Discussion

This cross-sectional survey of 1 295 HCWs from two large referral hospitals in the Eastern Cape Province combined two diagnostic modalities (SARS-CoV-2 PCR and SARS-CoV-2 IgG antibodies) to estimate the cumulative incidence of SARS-CoV-2 infection. The study showed a high rate of SARS-CoV-2 infection (47.2%) after the first wave of COVID-19 among the HCWs in the region. The estimated true SARS-CoV-2 IgG seroprevalence, using the calculated IgG degradation rate, was even higher at 55.0%. These rates are more than double the official figures reported for doctors and nurses subsequent to the second wave in the Eastern Cape province (18.2-22.3% PCR positive).<sup>7</sup> The 30.1% SARS-CoV-2 PCR positivity is significantly higher than the pooled prevalence of 11% (95% CI; 7-15%) from a systematic review of 46 studies among HCWs worldwide.<sup>20</sup> Similarly the 37.7% SARS-CoV-2 IgG seropositivity is higher than the pooled prevalence of 7% (95% CI; 4-11%) of 27,445 HCWs in the same review.<sup>20</sup>

In order to obtain reliable epidemiologic data on the infection rate with SARS-CoV-2 for strategic planning, a minimum of two or more data sources should be combined. Findings from this study demonstrate the importance of combining PCR results with antibody testing within a population to assess more accurately the cumulative incidence of SARS-CoV-2 infection. Neither of the modalities alone was accurate in estimating the infection rate in the study as



1  
2  
3 reflected by the 31.5% of IgG negative results in HCWs who had been documented as SARS-  
4 CoV-2 PCR positive. These likely represent cases of decay in the humoral immune response  
5 with IgG levels falling below the assay detection threshold over time. A study of the duration  
6 of SARS-CoV-2 IgG anti-nucleocapsid antibodies among 452 HCWs reported decline starting  
7 within 1 month after first positive PCR, with an estimated half-life of 85 days and 50%  
8 seronegative after 7 months.<sup>21</sup> On the other hand, SARS-CoV-2 IgG testing identified 17.1%  
9 of participants with infections that had been missed by PCR. Two thirds (146/221) of these  
10 missed infections reported negative PCR tests. These likely represent false negative PCR  
11 results; suboptimal sample collections, or swabs that were taken before or after the peak of  
12 viral shedding.<sup>22-24</sup> The other third (75/221) of the missed infections had never had a PCR test  
13 performed. These were likely asymptomatic infections or patients with mild symptoms that did  
14 not lead to PCR testing.  
15  
16  
17  
18  
19  
20  
21  
22  
23  
24  
25

26 In terms of risk factors for SARS-CoV-2 infection among HCWs, the only significant risk  
27 factors in the adjusted multivariate logistic regression analysis were having an increased BMI  
28 (overweight or obese) and being HIV positive. While these factors have been reported as risks  
29 for infection among the general population in some reports<sup>2,5,12,14,18</sup>, this is the first time they  
30 have been linked in a specifically HCW population. Stratifying areas of work into low, medium  
31 and high risk for SARS-CoV-2 exposure did not identify significant differences in infection  
32 risk, contrary to findings by Iversen et al.<sup>8</sup> There was also no difference in infection prevalence  
33 across different professions. These are important negative findings of this study, and contribute  
34 some insights into SARS-CoV-2 exposure and transmission in these hospital environments. Of  
35 interest for epidemiologic purposes are two pertinent questions. ‘Why did doctors and nurses  
36 working in designated COVID-19 clinical areas not experience higher infection rates than non-  
37 clinical staff?’ and ‘Did improved use of PPE in these designated clinical areas effectively level  
38 this risk?’  
39  
40  
41  
42  
43  
44  
45  
46  
47  
48  
49

50 Despite a large proportion (80%) of HCWs having been trained on the use of PPE, and they  
51 confirmed that PPEs were available for use, there was no correlation with SARS-CoV-2  
52 infection in the cohort. A prospective study of SARS-CoV-2 infections among 10,034 UK  
53 HCWs, showed a lower risk of infection among ICU clinical staff, suggesting that training on  
54 PPE and strict adherence to infection control protocols protected staff in high risk areas.<sup>9</sup> While  
55 there were concerns about inadequate quantities and quality of PPE during the period prior to  
56 the study, there was never a total shortage of PPE for use in COVID-19 clinical areas in either  
57  
58  
59  
60

1  
2  
3 of the two facilities. Another plausible explanation for the results could be the strict adherence  
4 to symptom screening of all staff in the COVID-19 clinical areas throughout the period. Prompt  
5 diagnosis and isolation of infected individuals will prevent further spread among HCWs in the  
6 same work areas<sup>2,3</sup>. Furthermore, it was not infrequent for COVID-19 cases to be diagnosed  
7 in the non-COVID-19 clinical areas, which could account for similarly high proportions of  
8 staff infection in low, medium and high-risk clinical areas. Certain support staff categories  
9 were classified as 'low risk' but may have had transient exposure to COVID-19 patients, wards  
10 or potentially contaminated linen etc. e.g. porters, laundry and kitchen staff.  
11  
12  
13  
14  
15  
16  
17  
18

19 Transmission of SARS-CoV-2 between HCWs in the common areas during tea and lunch  
20 breaks, when staff interact socially with or without masks was not measured in the study, but  
21 is quite probable to have occurred to some degree. Almost 10% of the PCR positive staff were  
22 asymptomatic at the time of testing, and may have been responsible for some onward  
23 transmission of infection to colleagues. It was hypothesised that taking shared or public  
24 transport to work would increase the risk of infection compared to solo vehicle transport, but  
25 this was not found to be significant. At the time of this study, there were no community  
26 seroprevalence data with which to compare our findings. During the second epidemiologic  
27 wave, Sykes et al. reported a seropositivity rate of 63% among blood donors from the Eastern  
28 Cape, the highest among four provinces sampled in the country in January 2021.<sup>25</sup> This study  
29 only sampled 1,457 donors, a select group of healthy volunteers from four provinces. It is  
30 therefore difficult to estimate the community prevalence at the time of our study.  
31 Notwithstanding, there is a strong possibility of a high- exposure environment outside of the  
32 hospitals in the region. A previous UK study found that having a household COVID-19 contact  
33 was the strongest risk factor for HCW infection [AOR 4.82; 95% CI 3.45–6.72].<sup>9</sup>  
34  
35  
36  
37  
38  
39  
40  
41  
42  
43  
44  
45

46 Being overweight or obese has been linked to increased susceptibility to SARS-CoV-2  
47 infection, as well as to disease severity and increased mortality. A meta-analysis of 20 studies  
48 assessing obesity and risk of SARS-CoV-2 infection found an odds ratio of 1.46 (95% CI 1.30-  
49 1.65).<sup>26</sup> Poorer outcomes for respiratory viruses in the obese had been described prior to SARS-  
50 CoV-2 with the H1N1 influenza pandemic.<sup>27</sup> The mechanisms for the increased vulnerability  
51 to SARS-CoV-2 among the overweight and obese are complex. Obesity is associated with a  
52 pro-inflammatory phenotype and systemic low-grade inflammation.<sup>27</sup> Obesity dampens and  
53 delays both the innate and the adaptive immune response to infection with reduced efficacy of  
54 B- and T- cell responses. Obesity is also associated with poorer response to vaccination, likely  
55  
56  
57  
58  
59  
60



1  
2  
3 through the same immune dampening effects.<sup>27</sup> This sample of HCWs revealed alarmingly  
4 high rates of being either overweight (22.7%) or obese (63.1%), which is a concern due to  
5 increased vulnerability to respiratory viral infections as well as the non-communicable disease  
6 risks linked such as type 2 diabetes mellitus, hypertension, cardiovascular diseases and certain  
7 cancers.<sup>28</sup>  
8  
9  
10  
11  
12

13 There is epidemiological evidence for an increased susceptibility to SARS-CoV-2 with HIV  
14 infection. A systematic review and meta-analysis of almost 21 million people across multiple  
15 continents reported a risk ratio of 1.24 (95% CI 1.05-1.46) for SARS-CoV-2 infection among  
16 people living with HIV compared to those uninfected by HIV.<sup>29</sup> The HIV prevalence of 7.3%  
17 in this cohort may be an underestimate, given the self-reported nature of the data and some  
18 infected individuals may not have been diagnosed. The estimated adult HIV prevalence in the  
19 local district is 13.6%, as a comparison.<sup>30</sup> Data on CD4 cell counts and antiretroviral therapy  
20 use were not obtained in this study, but would have added more insight into the HIV-related  
21 risk. Like obesity, HIV is an important vulnerability to be managed among HCWs in relation  
22 to SARS-CoV-2 and other infections such as *Mycobacterium tuberculosis*.  
23  
24  
25  
26  
27  
28  
29  
30  
31

### 32 **Strengths and limitations**

34 This is the first reported study to have combined two diagnostic modalities to estimate the  
35 cumulative incidence of SARS-CoV-2 infection among HCWs in South Africa. Findings will  
36 inform IPC policies in the region. However, this study does have some limitations. Due to the  
37 pragmatic nature of the local policy relating to PCR testing for SARS-CoV-2, testing was  
38 largely limited to symptomatic staff (87,7% of PCR positive staff were symptomatic), which  
39 would have missed some asymptomatic infections. HIV serology and CD4 counts were not  
40 tested, but relied on self-reporting of individual HIV status, which may likely underestimate  
41 the burden of HIV in the cohort.  
42  
43  
44  
45  
46  
47  
48  
49

### 50 **Conclusion**

52 We report a high SARS-CoV-2 cumulative incidence of 47.2% after the first epidemiologic  
53 wave among HCWs from two referral hospitals in the Eastern Cape, South Africa. This is one  
54 of the highest reported in the literature and more than double that of the official figures for  
55 HCWs in the region. Being overweight or obese were significant risks for infection, and over  
56 85% of HCWs fell into these categories. HIV infection was also associated with increased  
57  
58  
59  
60

1  
2  
3 infection in the cohort. There were similar rates of infection across low, medium and high  
4 SARS-CoV-2 transmission risk areas, suggesting that significant transmission of infection  
5 occurred between colleagues or outside the workplace. Staff wellness programmes should  
6 address weight reduction and regular HIV testing and treatment, to mitigate vulnerabilities in  
7 this essential workforce.  
8  
9  
10  
11  
12

### 13 **Author contributorship**

14 DS, VA, MS, JB, EJ, AP contributed to the conception and design of the study.

15 DS, VA, MS, JB, EJ, SA contributed to data collection. DS, VA, SA, AP contributed to data  
16 analysis. DS and VA drafted the article. DS, VA, MS, JB, EJ, AP, SA provided critical  
17 revision of the article and final approval for submission for publication.  
18  
19  
20  
21  
22

### 23 **Acknowledgements**

24 The authors are grateful for the support and enthusiasm shown by the management and staff of  
25 the two hospitals toward the implementation of the study.  
26  
27  
28  
29

### 30 **Data sharing**

31 The study data isn't available in a repository, but sharing will be considered by request.  
32  
33  
34  
35  
36  
37  
38  
39

### 40 **References**

- 41 1. *COVID-19 Weekly Epidemiological Brief*; 2021. <https://www.nicd.ac.za/wp-content/uploads/2021/10/COVID-19-Weekly-Epidemiology-Brief-week-39-2021.pdf>.
- 42 2. Nguyen L, Drew D, Graham M, Joshi A. Risk of COVID-19 among front-line health-  
43 care workers and the general community: a prospective cohort study. *Lancet Public*  
44 *Heal.* 2020;5(July 31):475-483.
- 45 3. Houlihan CF, Vora N, Byrne T, et al. Pandemic peak SARS-CoV-2 infection and  
46 seroconversion rates in London frontline health-care workers. *Lancet.*  
47 2020;396(10246):e6-e7. doi:10.1016/S0140-6736(20)31484-7
- 48 4. Coltart CEM, Wells D, Sutherland E, Fowler A, Sutherland E. National cross- -  
49 sectional survey of 1.14 million NHS staff SARS-CoV-2 serology- tests : a  
50 comparison of NHS staff with regional community seroconversion rates. *BMJ Open.*  
51  
52  
53  
54  
55  
56  
57  
58  
59  
60

- 2021:1-7. doi:10.1136/bmjopen-2021-049703
5. Goldblatt D, Johnson M, Falup-Pecurariu O, Ivaskевичiene I, Spoulou V, Tamm E. Cross-sectional prevalence of SARS-CoV-2 antibodies in healthcare workers in paediatric facilities in eight countries. *J Hosp Infect.* 2021;110:60-66.
  6. Chibwana M, Khuzwayo J, Kham'gona R. *High SARS-CoV-2 Seroprevalence in Health Care Workers but Relatively Low Numbers of Deaths in Urban Malawi.*; 2020. <https://doi.org/10.1101/2020.07.30.20164970>.
  7. Eastern Cape DoH. *Eastern Cape Health Department. Daily Epidemiological Report for SARS-Cov\_2 Report No. 321.*; 2021.
  8. Iversen K, Bundgaard H, Hasselbach R. Risk of COVID-19 in health-care workers in Denmark: an observational cohort study. *Lancet Infect Dis.* 2020;(August 3):19-21.
  9. Eyre DW, Lumley SF, O'donnell D, et al. Differential occupational risks to healthcare workers from SARS-CoV-2 observed during a prospective observational study. *Elife.* 2020;9:1-37. doi:10.7554/ELIFE.60675
  10. Galanis P, Vrakka I, Fragkou D, Bilali A, Kaitelidou D. Seroprevalence of SARS-CoV-2 antibodies and associated factors in healthcare workers: a systematic review and meta-analysis. *J Hosp Infect.* 2020;108(November):120-134.
  11. Sotgiu G, Barassi A, Miozzo M, et al. SARS-CoV-2 specific serological pattern in healthcare workers of an Italian COVID-19 forefront hospital. *BMC Pulm Med.* 2020;20(1):1-6. doi:10.1186/s12890-020-01237-0
  12. Hunter E, Price DA, Murphy E, et al. First experience of COVID-19 screening of health-care workers in England. *Lancet.* 2020;395(10234):e77-e78. doi:10.1016/S0140-6736(20)30970-3
  13. Chou R, Dana T, Buckley DI, Selph S, Fu R, Totten AM. Epidemiology of and Risk Factors for Coronavirus Infection in Health Care Workers: A Living Rapid Review. *Ann Intern Med.* 2020;173(2):120-136. doi:10.7326/M20-1632
  14. Martin C, Montesinos I, Dauby N. Dynamics of SARS-CoV-2 RT-PCR positivity and seroprevalence among high-risk healthcare workers and hospital staff. *J Hosp Infect.* 2020;106(June):19-20.
  15. de Lusignan S, Dorward J, Correa A, et al. Risk factors for SARS-CoV-2 among patients in the Oxford Royal College of General Practitioners Research and Surveillance Centre primary care network: a cross-sectional study. *Lancet Infect Dis.* 2020;20(9):1034-1042. doi:10.1016/S1473-3099(20)30371-6
  16. *Statistics South Africa (2016) Provincial Profile: Eastern Cape Community Survey*

- 2016.; 2016. [www.statssa.gov.za](http://www.statssa.gov.za).
17. Bham A, Bhimam J, Bongweni F, Blumberg L, Cohen C, Erasmus L. *Clinical Management of Suspected or Confirmed COVID-19 Disease*. Vol 5.; 2020. [https://www.nicd.ac.za/wp-content/uploads/2020/07/NICD\\_DoH-COVID-19-Guidelines\\_Final\\_3-Jul-2020.pdf](https://www.nicd.ac.za/wp-content/uploads/2020/07/NICD_DoH-COVID-19-Guidelines_Final_3-Jul-2020.pdf).
  18. Assay I, Boise S, Mathias PC, Greninger L. Performance Characteristics of the Abbott Architect SARS-CoV- 2 IgG Assay and Seroprevalence in Boise, Idaho. *J Clin Micro*. 2020;58(8):4-11.
  19. Guan W, Ni Z, Hu Y. Clinical characteristics of coronavirus disease 2019 in China. *NEJM*. 2020;382(18):1708-1720.
  20. Gomez-Ochoa S, Franco O, Rojas L. COVID-19 in Healthcare Workers: A Living Systematic Review and Meta-analysis of Prevalence, Risk Factors, Clinical Characteristics, and outcomes. *Am J Epidemiol*. 2021;190(1):161-175.
  21. Lumley S, Wei J, O'Donnell D. The duration, dynamics and determinants of SARS-CoV-2 antibody responses in individual healthcare workers. *Clin Infect Dis*. 2021. doi:doi:10.1093/cid/ciab004
  22. Arevalo-Rodriguez I, Buitrago-Garcia D, Simancas-Racines D, et al. False-negative results of initial RT-PCR assays for COVID-19: A systematic review. *PLoS One*. 2020;15(12 December):1-19. doi:10.1371/journal.pone.0242958
  23. Mallett S, Allen AJ, Graziadio S, et al. At what times during infection is SARS-CoV-2 detectable and no longer detectable using RT-PCR-based tests? A systematic review of individual participant data. *BMC Med*. 2020;18(1):1-17. doi:10.1186/s12916-020-01810-8
  24. Ngai Yung Tsang N, Chi So H, Ya Ng K, Cowling B. Diagnostic performance of different sampling approaches for SARS-CoV-2 RT-PCR testing: a systematic review and meta-analysis. *Lancet Infect Dis*. 2021;21(April):1233-1245.
  25. Sykes W, Mhlanga L, Swanevelder R, et al. *Prevalence of Anti-SARS-CoV-2 Antibodies among Blood Donors in Northern Cape, KwaZulu-Natal, Eastern Cape, and Free State Provinces of South Africa in January 2021.*; 2021. doi:10.21203/rs.3.rs-233375/v1
  26. Popkin BM, Du S, Green WD, et al. Individuals with obesity and COVID-19: A global perspective on the epidemiology and biological relationships. *Obes Rev*. 2020;21(11):1-17. doi:10.1111/obr.13128
  27. Goossens GH, Dicker D, Farpour-Lambert NJ, et al. Obesity and COVID-19: A

- 1  
2  
3 Perspective from the European Association for the Study of Obesity on Immunological  
4 Perturbations, Therapeutic Challenges, and Opportunities in Obesity. *Obes Facts*.  
5 2020;13(4):439-452. doi:10.1159/000510719  
6  
7  
8  
9 28. de Frel DL, Atsma DE, Pijl H, et al. The impact of obesity and lifestyle on the immune  
10 system and susceptibility to infections such as COVID-19. *Front Nutr*. 2020;(7):279.  
11  
12 29. Ssentongo P, Heilbrunn ES, Ssentongo AE, et al. Epidemiology and outcomes of  
13 COVID-19 in HIV-infected individuals: a systematic review and meta-analysis. *Sci*  
14 *Rep*. 2021;11(1):1-12. doi:10.1038/s41598-021-85359-3  
15  
16  
17 30. Shisana O, Rehle T, Simbayi L, Zuma K, Jooste, S, Zungu N, Labadarios, D, Onoya D  
18 et al. *South African National HIV Prevalence, Incidence and Behaviour Survey, 2012*.  
19 Cape Town; 2014. www.hsrapress.ac.za.  
20  
21  
22  
23  
24  
25  
26  
27  
28  
29  
30  
31  
32  
33  
34  
35  
36  
37  
38  
39  
40  
41  
42  
43  
44  
45  
46  
47  
48  
49  
50  
51  
52  
53  
54  
55  
56  
57  
58  
59  
60

**Table 1: Baseline characteristics of the participants (n = 1,295)**

| Variable                                             | Frequency | Percentage |
|------------------------------------------------------|-----------|------------|
| <b>Sex</b>                                           |           |            |
| Males                                                | 240       | 18.5       |
| Females                                              | 1055      | 81.5       |
| <b>Age (years)</b>                                   |           |            |
| 18-25                                                | 71        | 5.49       |
| 26-35                                                | 325       | 25.12      |
| 36-45                                                | 349       | 26.97      |
| 46-55                                                | 346       | 26.74      |
| >55                                                  | 203       | 15.69      |
| <b>*Race</b>                                         |           |            |
| Black                                                | 1019      | 78.7       |
| White                                                | 114       | 8.8        |
| Coloured                                             | 98        | 7.6        |
| Others                                               | 53        | 4.1        |
| <b>Level of Education</b>                            |           |            |
| Tertiary                                             | 925       | 71.5       |
| Secondary                                            | 357       | 27.6       |
| Primary                                              | 12        | 0.9        |
| <b>Smoking Status</b>                                |           |            |
| Never smoked                                         | 1178      | 91.0       |
| Active smoker                                        | 72        | 5.6        |
| Former smoker                                        | 44        | 3.4        |
| <b>Profession</b>                                    |           |            |
| Medical doctors                                      | 176       | 13.6       |
| Pharmacy staff                                       | 61        | 4.7        |
| Nurses                                               | 580       | 44.8       |
| Allied staff                                         | 105       | 8.1        |
| Support staff                                        | 372       | 28.8       |
| <b>Direct contact with a confirmed COVID-19 case</b> |           |            |
| Yes                                                  | 998       | 77.1       |
| No                                                   | 296       | 22.9       |
| <b>Attended PPE training</b>                         |           |            |
| Yes                                                  | 1027      | 79.4       |
| No                                                   | 267       | 20.6       |

\*n = 10 participants did not indicate their race group

PPE = Personal protective equipment

**Table 2. Confirmation of SARS-CoV-2 infection among the participants**

| Variables    | IgG Positive (n; %) | IgG Negative (n; %) | Total (n; %) |
|--------------|---------------------|---------------------|--------------|
| PCR Positive | 267 (68.5)          | 123 (31.5)          | 390 (30.1)   |
| PCR Negative | 146 (22.8)          | 494 (77.2)          | 640 (49.5)   |
| Never tested | 75 (28.4)           | 189 (71.6)          | 264 (20.4)   |
| Total        | 488 (37.7)          | 806 (62.3)          | 1294 (100)   |

IgG = Immunoglobulin G; PCR = Polymerase chain reaction; SARS-CoV-2 = Severe acute respiratory syndrome coronavirus-2

For peer review only



**Table 3. Relationship between socio-demographic characteristics and SARS-CoV-2 by Pearson  $\chi^2$  test**

| Variable                                             | SARS-CoV-2 by PCR and/or IgG |                | p-values         |
|------------------------------------------------------|------------------------------|----------------|------------------|
|                                                      | Yes (%)                      | No (%)         |                  |
| <b>All</b>                                           | n = 611 (47.2)               | n = 683 (52.8) |                  |
| <b>Sex</b>                                           |                              |                | <b>0.007</b>     |
| Males                                                | 95 (39.6)                    | 145 (60.4)     |                  |
| Females                                              | 517 (49.0)                   | 538 (51.0)     |                  |
| <b>Age</b>                                           |                              |                | 0.628            |
| <45 years                                            | 347 (46.6)                   | 397 (53.4)     |                  |
| >45 years                                            | 346 (54.7)                   | 286 (45.3)     |                  |
| <b>Race</b>                                          |                              |                | <b>&lt;0.001</b> |
| Black                                                | 524 (51.4)                   | 495 (48.6)     |                  |
| White                                                | 30 (26.3)                    | 84 (73.7)      |                  |
| Coloured                                             | 29 (29.6)                    | 69 (70.4)      |                  |
| Others                                               | 18 (34.0)                    | 35 (66.0)      |                  |
| <b>Level of Education</b>                            |                              |                | <b>0.003</b>     |
| Tertiary                                             | 418 (45.2)                   | 507 (54.8)     |                  |
| Secondary                                            | 191 (53.5)                   | 166 (46.5)     |                  |
| Primary                                              | 02 (16.7)                    | 10 (83.3)      |                  |
| <b>Smoking Status</b>                                |                              |                | <b>&lt;0.001</b> |
| Never smoked                                         | 580 (49.2)                   | 598 (50.8)     |                  |
| Active smoker                                        | 17 (23.6)                    | 55 (76.4)      |                  |
| Former smoker                                        | 14 (31.8)                    | 30 (68.2)      |                  |
| <b>Covid-19 exposure by Ward</b>                     |                              |                | <b>0.008</b>     |
| High risk                                            | 151 (51.2)                   | 144 (48.8)     |                  |
| Medium risk                                          | 265 (42.7)                   | 355 (57.3)     |                  |
| Low risk                                             | 195 (51.5)                   | 184 (48.6)     |                  |
| <b>Profession</b>                                    |                              |                | <b>&lt;0.001</b> |
| Medical doctors                                      | 55 (31.2)                    | 121 (68.8)     |                  |
| Pharmacy staff                                       | 28 (45.9)                    | 33 (54.1)      |                  |
| Nurses                                               | 311 (53.6)                   | 269 (46.4)     |                  |
| Allied staff                                         | 25 (23.8)                    | 80 (76.2)      |                  |
| Support staff                                        | 192 (51.6)                   | 180 (48.4)     |                  |
| <b>Direct contact with a confirmed COVID-19 case</b> |                              |                | 0.337            |
| Yes                                                  | 464 (46.5)                   | 534 (53.5)     |                  |
| No                                                   | 147 (49.7)                   | 149 (50.3)     |                  |
| <b>Attended PPE training</b>                         |                              |                | 0.498            |
| Yes                                                  | 480 (46.7)                   | 547 (53.3)     |                  |
| No                                                   | 131 (49.1)                   | 136 (50.9)     |                  |

IgG = Immunoglobulin G; PCR = Polymerase chain reaction; PPE = Personal protective equipment; SARS-CoV-2 = Severe acute respiratory syndrome coronavirus-2.

Support staff = Administration/Management staff (51/98; 52.0%), General workers (31/61; 50.8%), Kitchen staff (23/33; 69.7%), Porters (06/15; 40.0%), Stores/Sales staff (0/5), Mortuary staff (4/5; 80.0%), Laundry staff (23/39; 59.0%). \*117 of the support staff did not indicate their duties.

Allied Workers = Radiology staff (9/37; 24.3%), Social workers (1), Physiotherapists (1), Dieticians (1), \*68 of allied workers did not indicate their duties.

**Table 4: Relationship between co-morbidities and SARS-CoV-2 by Pearson  $\chi^2$  test**

| Variables                     | Positive SARS-CoV-2 PCR and/ or IgG |                | p-values         |
|-------------------------------|-------------------------------------|----------------|------------------|
|                               | Yes (%)                             | No (%)         |                  |
| <b>All</b>                    | n = 611 (47.2)                      | n = 683 (52.8) |                  |
| <b>*BMI</b>                   |                                     |                | <b>&lt;0.001</b> |
| Underweight                   | 4 (57.1)                            | 3 (42.9)       |                  |
| Normal weight                 | 47 (26.7)                           | 129 (73.3)     |                  |
| Overweight                    | 121 (41.4)                          | 171 (58.6)     |                  |
| Obese                         | 434 (53.5)                          | 378 (46.6)     |                  |
| <b>Diabetes</b>               |                                     |                | 0.076            |
| Yes                           | 56 (54.4)                           | 47 (45.6)      |                  |
| No                            | 555 (46.6)                          | 636 (53.4)     |                  |
| <b>Hypertension</b>           |                                     |                | 0.246            |
| Yes                           | 119 (50.6)                          | 116 (49.4)     |                  |
| No                            | 492 (46.5)                          | 567 (53.5)     |                  |
| <b>HIV</b>                    |                                     |                | 0.300            |
| Yes                           | 40 (42.1)                           | 55 (57.9)      |                  |
| No                            | 571 (47.6)                          | 628 (52.4)     |                  |
| <b>TB</b>                     |                                     |                | 0.141            |
| Yes                           | 11 (34.4)                           | 21 (65.6)      |                  |
| No                            | 600 (47.5)                          | 662 (52.5)     |                  |
| <b>Chronic Kidney Disease</b> |                                     |                | 0.074            |
| Yes                           | 07 (29.2)                           | 17 (70.8)      |                  |
| No                            | 604 (47.6)                          | 666 (52.4)     |                  |
| <b>Heart Disease</b>          |                                     |                | 0.496            |
| Yes                           | 15 (53.6)                           | 13 (46.4)      |                  |
| No                            | 596 (47.1)                          | 670 (52.9)     |                  |
| <b>Asthma/COPD</b>            |                                     |                | 0.143            |
| Yes                           | 31 (39.2)                           | 48 (60.8)      |                  |
| No                            | 580 (47.7)                          | 635 (52.3)     |                  |
| <b>Liver Disease</b>          |                                     |                | 0.169            |
| Yes                           | 06 (31.6)                           | 13 (68.4)      |                  |
| No                            | 605 (47.5)                          | 670 (52.6)     |                  |
| <b>Cancer</b>                 |                                     |                | 0.515            |
| Yes                           | 8 (40.0)                            | 12 (60.0)      |                  |
| No                            | 603 (47.3)                          | 671 (52.7)     |                  |

BMI = Body mass index; IgG = Immunoglobulin G; TB = Tuberculosis; SARS-CoV-2 = Severe acute respiratory syndrome coronavirus-2; COPD = Chronic obstructive pulmonary disease.

**Table 5. Adjusted and unadjusted logistic regression model showing risk factors for SARS-CoV-2 infection among HCWs**

| Variables                                            | UOR (95%CI)       | p-value          | AOR (95%CI)       | p-value          |
|------------------------------------------------------|-------------------|------------------|-------------------|------------------|
| <b>Sex</b>                                           |                   |                  |                   |                  |
| Males                                                | Ref               |                  | Ref               |                  |
| Females                                              | 1.48 (1.11-1.79)  | <b>0.007</b>     | 1.09 (0.78-1.51)  | 0.595            |
| <b>Race</b>                                          |                   |                  |                   |                  |
| Others                                               | Ref               |                  | Ref               |                  |
| Coloured                                             | 0.48 (0.27-0.86)  | <b>0.015</b>     | 1.06 (0.55-2.06)  | 0.848            |
| White                                                | 1.44 (0.71-2.91)  | 0.311            | 1.46 (0.69-3.07)  | 0.313            |
| Black                                                | 0.91 (0.91-1.81)  | 0.789            | 1.28 (0.61-2.71)  | 0.504            |
| <b>Level of Education</b>                            |                   |                  |                   |                  |
| Tertiary                                             | Ref               |                  | Ref               |                  |
| Secondary                                            | 4.12 (0.89-18.91) | 0.068            | 3.05 (0.62-14.85) | 0.166            |
| Primary                                              | 0.71 (0.56-0.91)  | <b>0.008</b>     | 0.90 (0.67-1.22)  | 0.509            |
| <b>Smoking Status</b>                                |                   |                  |                   |                  |
| Never smoked                                         | Ref               |                  | Ref               |                  |
| Active smoker                                        | 0.48 (0.25-0.91)  | <b>0.026</b>     | 0.65 (0.32-1.29)  | 0.222            |
| Former smoker                                        | 1.51 (0.65-3.48)  | 0.334            | 1.77 (0.73-4.25)  | 0.199            |
| <b>Profession</b>                                    |                   |                  |                   |                  |
| Support staff                                        | Ref               |                  | Ref               |                  |
| Allied staff                                         | 2.34 (1.60-3.42)  | <b>&lt;0.001</b> | 1.92 (0.83-4.43)  | 0.124            |
| Nurses                                               | 1.25 (0.73-2.16)  | 0.409            | 0.84 (0.35-1.99)  | 0.693            |
| Pharmacy staff                                       | 0.93 (0.71-1.19)  | 0.545            | 0.88 (0.42-1.84)  | 0.747            |
| Medical doctors                                      | 3.41 (2.08-5.58)  | <b>&lt;0.001</b> | 1.52 (0.67-3.45)  | 0.316            |
| <b>COVID-19 Exposure by Ward</b>                     |                   |                  |                   |                  |
| Low risk                                             | Ref               |                  | Ref               |                  |
| Medium risk                                          | 0.69 (0.53-0.90)  | 0.006            | 1.19 (0.59-2.41)  | 0.749            |
| High risk                                            | 0.97 (0.71-1.32)  | 0.883            | 0.88 (0.42-1.86)  | 0.611            |
| <b>Direct contact with a confirmed COVID-19 case</b> |                   |                  |                   |                  |
| No                                                   | Ref               |                  | Ref               |                  |
| Yes                                                  | 0.88 (0.67-1.14)  | 0.338            | 1.01 (0.75-1.36)  | 0.928            |
| <b>Attended PPE training</b>                         |                   |                  |                   |                  |
| Yes                                                  | Ref               |                  | Ref               |                  |
| No                                                   | 1.09 (0.83-1.42)  | 0.498            | 0.99 (0.74-1.33)  | 0.996            |
| <b>Use of public transport</b>                       |                   |                  |                   |                  |
| No                                                   | Ref               |                  | Ref               |                  |
| Yes                                                  | 0.63 (0.51-0.79)  | <b>&lt;0.001</b> | 0.94 (0.69-1.17)  | 0.444            |
| <b>BMI</b>                                           |                   |                  |                   |                  |
| Underweight                                          | -                 |                  | -                 |                  |
| Normal                                               | Ref               |                  | Ref               |                  |
| Overweight                                           | 3.15 (2.19-4.53)  | <b>&lt;0.001</b> | 2.15 (1.44-3.20)  | <b>&lt;0.001</b> |
| Obese                                                | 1.62 (1.23-2.12)  | <b>&lt;0.001</b> | 1.37 (1.02-1.85)  | <b>0.033</b>     |
| <b>Diabetes</b>                                      |                   |                  |                   |                  |
| No                                                   | Ref               |                  | Ref               |                  |
| Yes                                                  | 0.73 (0.48-1.09)  | 0.131            | 0.85 (0.55-1.32)  | 0.480            |
| <b>Hypertension</b>                                  |                   |                  |                   |                  |
| No                                                   | Ref               |                  | Ref               |                  |
| Yes                                                  | 0.84 (0.63-1.12)  | 0.246            | 1.08 (0.78-1.48)  | 0.628            |
| <b>HIV</b>                                           |                   |                  |                   |                  |
| No                                                   | Ref               |                  | Ref               |                  |
| Yes                                                  | 1.25 (0.81-1.19)  | 0.301            | 1.78 (1.38-2.08)  | <b>0.012</b>     |

BMI = Body mass index; HCWs = Healthcare workers; PPE = Personal protective equipment; SARS-CoV-2 = Severe acute respiratory syndrome coronavirus-2; UOR = Unadjusted odds ratio; AOR = Adjusted odds ratio

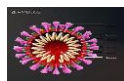

# ECHAS STUDY QUESTIONNAIRE – 2020<sub>v2.0</sub>

EASTERN CAPE HEALTHCARE WORKERS ACQUISITION OF SARS-COV-2

SECTION ONE – FOR ALL PARTICIPANTS (Mark chosen answers with a X, please answer truthfully)

|                                                                  |              |               |                  |                   |                |
|------------------------------------------------------------------|--------------|---------------|------------------|-------------------|----------------|
| 1. Participant Identifier (PTID)                                 |              |               |                  |                   |                |
| 2. Date of completion of questionnaire                           | dd           | mm            | mm               | yyyy              |                |
| 3. Consent has been read and understood                          | Yes          |               |                  | No                |                |
| 4. Facility completed at                                         | Frere        |               |                  | CMH               |                |
| 5. Initials of field worker assisting form completion            |              |               |                  |                   |                |
| <b>A. DEMOGRAPHIC INFORMATION</b>                                |              |               |                  |                   |                |
| 1. Date of Birth                                                 | dd           | mm            | mm               | yyyy              |                |
| 2. Sex                                                           | Male         |               |                  | Female            |                |
| 3. Ethnicity                                                     | Black        | White         | Coloured         | Indian            | Asian<br>Other |
| 4. Suburb of primary residence                                   |              |               |                  |                   |                |
| 5. Highest level of education                                    | Primary      | Secondary     | Matric           | Tertiary          |                |
| 6. How many people including yourself live in your house/flat?   |              |               |                  |                   |                |
| <b>B. RISK ASSESSMENT FOR SARS-COV-2</b>                         |              |               |                  |                   |                |
| 7. Smoking status                                                | Never smoked | Active smoker | Quit (>3 months) |                   |                |
| 8. <i>If active smoker:</i> Average number of cigarettes per day |              |               |                  |                   |                |
| 9. <i>If active/former smoker:</i> Number of years smoking:      | < 5          | 5-10          | 11-20            | >20               |                |
| 10. Diabetes                                                     | Yes          |               |                  | No                |                |
| 11. Hypertension                                                 | Yes          |               |                  | No                |                |
| 12. HIV                                                          | Yes          | No            |                  | Prefer not to say |                |
| 13. On treatment for TB in 2020                                  | Yes          |               |                  | No                |                |
| 14. Previous TB treatment                                        | Yes          |               |                  | No                |                |
| 15. Chronic Kidney Disease                                       | Yes          |               |                  | No                |                |
| 16. Heart disease                                                | Yes          |               |                  | No                |                |
| 17. Chronic steroid use or any immunosuppressant drugs           | Yes          |               |                  | No                |                |
| 18. Asthma/COPD                                                  | Yes          |               |                  | No                |                |
| 19. Liver disease                                                | Yes          |               |                  | No                |                |

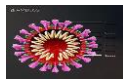

# ECHAS STUDY QUESTIONNAIRE – 2020<sub>v2.0</sub>

|                                                                                                        |             |                  |                  |                   |                 |  |
|--------------------------------------------------------------------------------------------------------|-------------|------------------|------------------|-------------------|-----------------|--|
| 20. Cancer                                                                                             | Yes         |                  |                  | No                |                 |  |
| 21. Currently pregnant?                                                                                | Yes         |                  |                  | No                |                 |  |
| 22. <i>If pregnant</i> , what is the gestational age (weeks):                                          |             |                  |                  |                   |                 |  |
| <b>C. PERSONAL PROTECTIVE EQUIPMENT AT WORK (may be 'not applicable' [N/A] for non-clinical areas)</b> |             |                  |                  |                   |                 |  |
| 23. Did you receive training in the correct use of PPE?                                                | Yes         |                  | No               |                   | N/A             |  |
| 24. Were FFP2/N95 masks available for you when needed?                                                 | Always      | Most of the time | Some of the time | Never             | N/A             |  |
| 25. Were surgical masks available for you when needed?                                                 | Always      | Most of the time | Some of the time | Never             | N/A             |  |
| 26. Were gloves available for you when needed?                                                         | Always      | Most of the time | Some of the time | Never             | N/A             |  |
| 27. Were protective gowns available for you when needed?                                               | Always      | Most of the time | Some of the time | Never             | N/A             |  |
| 28. Was eye protection (goggles or face shield) available for you when needed?                         | Always      | Most of the time | Some of the time | Never             | N/A             |  |
| 29. Were you confident about your use of PPEs when dealing with patients with COVID-19?                | Yes         | No               | Unsure           | N/A               |                 |  |
| <b>D. COVID-19 VACCINE</b>                                                                             |             |                  |                  |                   |                 |  |
| 30. Do you believe that a vaccine is needed to end COVID-19 pandemic?                                  | Yes         |                  |                  | No                |                 |  |
| 31. Do you think every health worker should get COVID-19 vaccine when it becomes available?            | Yes         |                  |                  | No                |                 |  |
| 32. When COVID-19 vaccine becomes available; will you be willing to receive the vaccine?               | Yes         |                  |                  | No                |                 |  |
| 33. Do you think vaccines are generally safe?                                                          | Yes         |                  |                  | No                |                 |  |
| 34. Have you ever refused vaccines in the past?                                                        | Yes         |                  |                  | No                |                 |  |
| 35. Have you experienced adverse effects from vaccines before?                                         | Yes         |                  |                  | No                |                 |  |
| <b>E. EXPOSURE RISK ASSESSMENT</b>                                                                     |             |                  |                  |                   |                 |  |
| 36. Duty at work                                                                                       | Doctor      | Nurse            | Allied health    | Management /admin | Porter          |  |
|                                                                                                        | Pharmacy    | Kitchen          | Radiology        | Mortuary          | Other:<br>..... |  |
| 37. <b>For doctors &amp; nurses only:</b> where were you working during June to August?                | Medical     | Surgery          | Casualty         | ICU               | O&G             |  |
|                                                                                                        | Paediatrics | Orthopaedics     | Theatre          | Other:<br>.....   |                 |  |
| 38. Have you had direct contact with COVID-19 patients at work?                                        | Yes         |                  |                  | No                |                 |  |

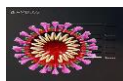

# ECHAS STUDY QUESTIONNAIRE – 2020<sub>v2.0</sub>

|                                                                                                                |      |          |        |         |                |
|----------------------------------------------------------------------------------------------------------------|------|----------|--------|---------|----------------|
| 39. Have you had direct contact with COVID-19 cases outside of work?                                           | Yes  |          | No     |         |                |
| 40. Do you take public transport to work?                                                                      | Yes  |          | No     |         |                |
| 41. Have you ever had a SARS-CoV-2 swab PCR test(s) done?                                                      | Yes  |          | No     |         |                |
| 42. Have you ever had a <b>positive</b> SARS-CoV-2 PCR Result?                                                 | Yes  |          | No     |         |                |
| 43. Date of any <b>positive</b> SARS-CoV-2 PCR? (approximate if unsure of exact date)                          | d d  | m m m    |        | y y y y |                |
| 44. Where was the test done?                                                                                   | NHLS | Pathcare | Ampath | Dischem | Other:         |
| 45. Were any of your household members diagnosed with COVID-19 around the same period as you?                  | Yes  |          | No     |         | Not applicable |
| 46. <i>If yes to 45, how many members tested positive?</i>                                                     |      |          |        |         |                |
| <b>F. SYMPTOMS AT THE TIME OF TAKING THE SARS-CoV-2 SWAB</b> ( <i>Answer only if 'yes' selected in no.41</i> ) |      |          |        |         |                |
| 47. Fever                                                                                                      | Yes  |          | No     |         |                |
| 48. Cough                                                                                                      | Yes  |          | No     |         |                |
| 49. Sore throat                                                                                                | Yes  |          | No     |         |                |
| 50. Shortness of breath                                                                                        | Yes  |          | No     |         |                |
| 51. Loss of smell                                                                                              | Yes  |          | No     |         |                |
| 52. Loss of taste                                                                                              | Yes  |          | No     |         |                |
| 53. Headache or body aches                                                                                     | Yes  |          | No     |         |                |
| 54. Diarrhoea and vomiting                                                                                     | Yes  |          | No     |         |                |
| 55. Fatigue/weakness/tiredness                                                                                 | Yes  |          | No     |         |                |
| 56. Red eyes (conjunctivitis)                                                                                  | Yes  |          | No     |         |                |
| <b>G. MANAGEMENT RECEIVED AFTER DIAGNOSIS OF COVID-19</b> ( <i>Answer only if 'yes' selected in no.42</i> )    |      |          |        |         |                |
| 57. Did you require hospitalization?                                                                           | Yes  |          | No     |         |                |
| 58. Number of days hospitalised                                                                                | <3   | 4-7      | 8-14   | 15-21   | >21            |
| 59. Did you require Oxygen at any time?                                                                        | Yes  |          | No     |         |                |
| 60. Were you admitted to ICU?                                                                                  | Yes  |          | No     |         |                |
| 61. Do you feel that you have fully recovered physically from COVID-19?                                        | Yes  |          | No     |         |                |
| 62. How many 'sick days' have you taken due to COVID-19?                                                       | <7   | 7-14     | 15-21  | 22-28   | >28            |

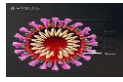

# ECHAS STUDY QUESTIONNAIRE – 2020<sub>v2.0</sub>

## H. PERSISTENCE OF COVID-19 SYMPTOMS (Answer only if 'yes' selected in no.42) (i.e. which, if any, of these symptoms are you still experiencing now?)

|                           |     |    |
|---------------------------|-----|----|
| 63. Headaches             | Yes | No |
| 64. Weakness              | Yes | No |
| 65. Tiredness             | Yes | No |
| 66. Shortness of breath   | Yes | No |
| 67. Cough                 | Yes | No |
| 68. Loss of taste/smell   | Yes | No |
| 69. Joint pain            | Yes | No |
| 70. Dizziness             | Yes | No |
| 71. Lack of appetite      | Yes | No |
| 72. Muscle pain (myalgia) | Yes | No |
| 73. Chest pain            | Yes | No |
| 74. List other symptom(s) |     |    |

## I. EMPLOYEE WELLNESS Are you currently experiencing any of the following?

|                                                                |     |    |
|----------------------------------------------------------------|-----|----|
| 75. Anxiety about coming to work:                              | Yes | No |
| 76. Low mood about coming to work:                             | Yes | No |
| 77. Loss of interest in patient care:                          | Yes | No |
| 78. Have you considered resigning/retiring from clinical work? | Yes | No |
| 79. Do you need staff health referral?                         | Yes | No |

## SECTION 2: NURSE MEASUREMENTS & BLOOD SAMPLE FOR SARS-CoV-2 SEROLOGY (All participants)

|                                                         |        |
|---------------------------------------------------------|--------|
| 80. Weight (Kg)                                         |        |
| 81. Height (cm)                                         |        |
| 82. Mid-upper arm circumference (cm)                    |        |
| 83. Bar Code (Specimen Identifier)                      |        |
| 84. Would you like to be notified of the blood results? | Yes No |



**STROBE 2007 (v4) Statement—Checklist of items that should be included in reports of *cross-sectional studies***

| Section/Topic                | Item # | Recommendation                                                                                                                                                                       | Reported on page # |
|------------------------------|--------|--------------------------------------------------------------------------------------------------------------------------------------------------------------------------------------|--------------------|
| <b>Title and abstract</b>    | 1      | (a) Indicate the study's design with a commonly used term in the title or the abstract                                                                                               | 2                  |
|                              |        | (b) Provide in the abstract an informative and balanced summary of what was done and what was found                                                                                  | 2                  |
| <b>Introduction</b>          |        |                                                                                                                                                                                      |                    |
| Background/rationale         | 2      | Explain the scientific background and rationale for the investigation being reported                                                                                                 | 3                  |
| Objectives                   | 3      | State specific objectives, including any prespecified hypotheses                                                                                                                     | 5                  |
| <b>Methods</b>               |        |                                                                                                                                                                                      |                    |
| Study design                 | 4      | Present key elements of study design early in the paper                                                                                                                              | 5                  |
| Setting                      | 5      | Describe the setting, locations, and relevant dates, including periods of recruitment, exposure, follow-up, and data collection                                                      | 5                  |
| Participants                 | 6      | (a) Give the eligibility criteria, and the sources and methods of selection of participants                                                                                          | 6                  |
| Variables                    | 7      | Clearly define all outcomes, exposures, predictors, potential confounders, and effect modifiers. Give diagnostic criteria, if applicable                                             | 7                  |
| Data sources/<br>measurement | 8*     | For each variable of interest, give sources of data and details of methods of assessment (measurement). Describe comparability of assessment methods if there is more than one group | 7                  |
| Bias                         | 9      | Describe any efforts to address potential sources of bias                                                                                                                            | 6                  |
| Study size                   | 10     | Explain how the study size was arrived at                                                                                                                                            | 6                  |
| Quantitative variables       | 11     | Explain how quantitative variables were handled in the analyses. If applicable, describe which groupings were chosen and why                                                         | 7                  |
| Statistical methods          | 12     | (a) Describe all statistical methods, including those used to control for confounding                                                                                                | 8                  |
|                              |        | (b) Describe any methods used to examine subgroups and interactions                                                                                                                  | 8                  |
|                              |        | (c) Explain how missing data were addressed                                                                                                                                          | 9                  |
|                              |        | (d) If applicable, describe analytical methods taking account of sampling strategy                                                                                                   |                    |
|                              |        | (e) Describe any sensitivity analyses                                                                                                                                                |                    |
| <b>Results</b>               |        |                                                                                                                                                                                      |                    |

|                          |     |                                                                                                                                                                                                                                                                                                                                                                                                               |    |
|--------------------------|-----|---------------------------------------------------------------------------------------------------------------------------------------------------------------------------------------------------------------------------------------------------------------------------------------------------------------------------------------------------------------------------------------------------------------|----|
| Participants             | 13* | (a) Report numbers of individuals at each stage of study—eg numbers potentially eligible, examined for eligibility, confirmed eligible, included in the study, completing follow-up, and analysed<br>(b) Give reasons for non-participation at each stage<br>(c) Consider use of a flow diagram                                                                                                               | 9  |
| Descriptive data         | 14* | (a) Give characteristics of study participants (eg demographic, clinical, social) and information on exposures and potential confounders<br>(b) Indicate number of participants with missing data for each variable of interest                                                                                                                                                                               | 9  |
| Outcome data             | 15* | Report numbers of outcome events or summary measures                                                                                                                                                                                                                                                                                                                                                          | 10 |
| Main results             | 16  | (a) Give unadjusted estimates and, if applicable, confounder-adjusted estimates and their precision (eg, 95% confidence interval). Make clear which confounders were adjusted for and why they were included<br>(b) Report category boundaries when continuous variables were categorized<br>(c) If relevant, consider translating estimates of relative risk into absolute risk for a meaningful time period | 10 |
| Other analyses           | 17  | Report other analyses done—eg analyses of subgroups and interactions, and sensitivity analyses                                                                                                                                                                                                                                                                                                                | 10 |
| <b>Discussion</b>        |     |                                                                                                                                                                                                                                                                                                                                                                                                               |    |
| Key results              | 18  | Summarise key results with reference to study objectives                                                                                                                                                                                                                                                                                                                                                      | 10 |
| Limitations              | 19  | Discuss limitations of the study, taking into account sources of potential bias or imprecision. Discuss both direction and magnitude of any potential bias                                                                                                                                                                                                                                                    | 12 |
| Interpretation           | 20  | Give a cautious overall interpretation of results considering objectives, limitations, multiplicity of analyses, results from similar studies, and other relevant evidence                                                                                                                                                                                                                                    | 14 |
| Generalisability         | 21  | Discuss the generalisability (external validity) of the study results                                                                                                                                                                                                                                                                                                                                         |    |
| <b>Other information</b> |     |                                                                                                                                                                                                                                                                                                                                                                                                               |    |
| Funding                  | 22  | Give the source of funding and the role of the funders for the present study and, if applicable, for the original study on which the present article is based                                                                                                                                                                                                                                                 | 3  |

\*Give information separately for cases and controls in case-control studies and, if applicable, for exposed and unexposed groups in cohort and cross-sectional studies.

**Note:** An Explanation and Elaboration article discusses each checklist item and gives methodological background and published examples of transparent reporting. The STROBE checklist is best used in conjunction with this article (freely available on the Web sites of PLoS Medicine at <http://www.plosmedicine.org/>, Annals of Internal Medicine at <http://www.annals.org/>, and Epidemiology at <http://www.epidem.com/>). Information on the STROBE Initiative is available at [www.strobe-statement.org](http://www.strobe-statement.org).
