# Supplementary material for: Cumulative incidence of SARS-CoV-2 and associated risk factors among healthcare workers: a cross-sectional study in the Eastern Cape, South Africa
Source: PubMed Central journal article supplement — BMJ Open. 2022 Mar 18;12(3):e058761. doi: 10.1136/bmjopen-2021-058761 (PMC8935006; doi:10.1136/bmjopen-2021-058761), 2022-03-18
Supplement: bmjopen-2021-058761supp001.pdf [file bmjopen-2021-058761supp001.pdf]

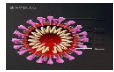

# ECHAS STUDY QUESTIONNAIRE – 2020<sub>v2.0</sub>

EASTERN CAPE HEALTHCARE WORKERS ACQUISITION OF SARS-COV-2

SECTION ONE – FOR ALL PARTICIPANTS (Mark chosen answers with a X, please answer truthfully)

|                                                                  |              |           |               |                   |                  |
|------------------------------------------------------------------|--------------|-----------|---------------|-------------------|------------------|
| 1. Participant Identifier (PTID)                                 |              |           |               |                   |                  |
| 2. Date of completion of questionnaire                           | dd           | mm        | mm            | yyyy              |                  |
| 3. Consent has been read and understood                          | Yes          |           |               | No                |                  |
| 4. Facility completed at                                         | Frere        |           |               | CMH               |                  |
| 5. Initials of field worker assisting form completion            |              |           |               |                   |                  |
| <b>A. DEMOGRAPHIC INFORMATION</b>                                |              |           |               |                   |                  |
| 1. Date of Birth                                                 | dd           | mm        | mm            | yyyy              |                  |
| 2. Sex                                                           | Male         |           |               | Female            |                  |
| 3. Ethnicity                                                     | Black        | White     | Coloured      | Indian            | Asian<br>Other   |
| 4. Suburb of primary residence                                   |              |           |               |                   |                  |
| 5. Highest level of education                                    | Primary      | Secondary | Matric        | Tertiary          |                  |
| 6. How many people including yourself live in your house/flat?   |              |           |               |                   |                  |
| <b>B. RISK ASSESSMENT FOR SARS-COV-2</b>                         |              |           |               |                   |                  |
| 7. Smoking status                                                | Never smoked |           | Active smoker |                   | Quit (>3 months) |
| 8. <i>If active smoker:</i> Average number of cigarettes per day |              |           |               |                   |                  |
| 9. <i>If active/former smoker:</i> Number of years smoking:      | < 5          | 5-10      | 11-20         | >20               |                  |
| 10. Diabetes                                                     | Yes          |           |               | No                |                  |
| 11. Hypertension                                                 | Yes          |           |               | No                |                  |
| 12. HIV                                                          | Yes          | No        |               | Prefer not to say |                  |
| 13. On treatment for TB in 2020                                  | Yes          |           |               | No                |                  |
| 14. Previous TB treatment                                        | Yes          |           |               | No                |                  |
| 15. Chronic Kidney Disease                                       | Yes          |           |               | No                |                  |
| 16. Heart disease                                                | Yes          |           |               | No                |                  |
| 17. Chronic steroid use or any immunosuppressant drugs           | Yes          |           |               | No                |                  |
| 18. Asthma/COPD                                                  | Yes          |           |               | No                |                  |
| 19. Liver disease                                                | Yes          |           |               | No                |                  |



## ECHAS STUDY QUESTIONNAIRE – 2020<sub>v2.0</sub>

|                                                                                                        |             |                  |                  |                   |                 |
|--------------------------------------------------------------------------------------------------------|-------------|------------------|------------------|-------------------|-----------------|
| 20. Cancer                                                                                             | Yes         |                  |                  | No                |                 |
| 21. Currently pregnant?                                                                                | Yes         |                  |                  | No                |                 |
| 22. <i>If pregnant</i> , what is the gestational age (weeks):                                          |             |                  |                  |                   |                 |
| <b>C. PERSONAL PROTECTIVE EQUIPMENT AT WORK (may be 'not applicable' [N/A] for non-clinical areas)</b> |             |                  |                  |                   |                 |
| 23. Did you receive training in the correct use of PPE?                                                | Yes         |                  | No               |                   | N/A             |
| 24. Were FFP2/N95 masks available for you when needed?                                                 | Always      | Most of the time | Some of the time | Never             | N/A             |
| 25. Were surgical masks available for you when needed?                                                 | Always      | Most of the time | Some of the time | Never             | N/A             |
| 26. Were gloves available for you when needed?                                                         | Always      | Most of the time | Some of the time | Never             | N/A             |
| 27. Were protective gowns available for you when needed?                                               | Always      | Most of the time | Some of the time | Never             | N/A             |
| 28. Was eye protection (goggles or face shield) available for you when needed?                         | Always      | Most of the time | Some of the time | Never             | N/A             |
| 29. Were you confident about your use of PPEs when dealing with patients with COVID-19?                | Yes         |                  | No               | Unsure            | N/A             |
| <b>D. COVID-19 VACCINE</b>                                                                             |             |                  |                  |                   |                 |
| 30. Do you believe that a vaccine is needed to end COVID-19 pandemic?                                  | Yes         |                  |                  | No                |                 |
| 31. Do you think every health worker should get COVID-19 vaccine when it becomes available?            | Yes         |                  |                  | No                |                 |
| 32. When COVID-19 vaccine becomes available; will you be willing to receive the vaccine?               | Yes         |                  |                  | No                |                 |
| 33. Do you think vaccines are generally safe?                                                          | Yes         |                  |                  | No                |                 |
| 34. Have you ever refused vaccines in the past?                                                        | Yes         |                  |                  | No                |                 |
| 35. Have you experienced adverse effects from vaccines before?                                         | Yes         |                  |                  | No                |                 |
| <b>E. EXPOSURE RISK ASSESSMENT</b>                                                                     |             |                  |                  |                   |                 |
| 36. Duty at work                                                                                       | Doctor      | Nurse            | Allied health    | Management /admin | Porter          |
|                                                                                                        | Pharmacy    | Kitchen          | Radiology        | Mortuary          | Other:<br>..... |
| 37. <b>For doctors &amp; nurses only:</b> where were you working during June to August?                | Medical     | Surgery          | Casualty         | ICU               | O&G             |
|                                                                                                        | Paediatrics | Orthopaedics     | Theatre          | Other:<br>.....   |                 |
| 38. Have you had direct contact with COVID-19 patients at work?                                        | Yes         |                  |                  | No                |                 |



## ECHAS STUDY QUESTIONNAIRE – 2020<sub>v2.0</sub>

|                                                                                                                |      |          |        |         |                |
|----------------------------------------------------------------------------------------------------------------|------|----------|--------|---------|----------------|
| 39. Have you had direct contact with COVID-19 cases outside of work?                                           | Yes  |          | No     |         |                |
| 40. Do you take public transport to work?                                                                      | Yes  |          | No     |         |                |
| 41. Have you ever had a SARS-CoV-2 swab PCR test(s) done?                                                      | Yes  |          | No     |         |                |
| 42. Have you ever had a <b>positive</b> SARS-CoV-2 PCR Result?                                                 | Yes  |          | No     |         |                |
| 43. Date of any <b>positive</b> SARS-CoV-2 PCR? (approximate if unsure of exact date)                          | d d  |          | m m m  |         | yyyy           |
| 44. Where was the test done?                                                                                   | NHLS | Pathcare | Ampath | Dischem | Other:         |
| 45. Were any of your household members diagnosed with COVID-19 around the same period as you?                  | Yes  |          | No     |         | Not applicable |
| 46. <i>If yes to 45, how many members tested positive?</i>                                                     |      |          |        |         |                |
| <b>F. SYMPTOMS AT THE TIME OF TAKING THE SARS-CoV-2 SWAB</b> ( <i>Answer only if 'yes' selected in no.41</i> ) |      |          |        |         |                |
| 47. Fever                                                                                                      | Yes  |          | No     |         |                |
| 48. Cough                                                                                                      | Yes  |          | No     |         |                |
| 49. Sore throat                                                                                                | Yes  |          | No     |         |                |
| 50. Shortness of breath                                                                                        | Yes  |          | No     |         |                |
| 51. Loss of smell                                                                                              | Yes  |          | No     |         |                |
| 52. Loss of taste                                                                                              | Yes  |          | No     |         |                |
| 53. Headache or body aches                                                                                     | Yes  |          | No     |         |                |
| 54. Diarrhoea and vomiting                                                                                     | Yes  |          | No     |         |                |
| 55. Fatigue/weakness/tiredness                                                                                 | Yes  |          | No     |         |                |
| 56. Red eyes (conjunctivitis)                                                                                  | Yes  |          | No     |         |                |
| <b>G. MANAGEMENT RECEIVED AFTER DIAGNOSIS OF COVID-19</b> ( <i>Answer only if 'yes' selected in no.42</i> )    |      |          |        |         |                |
| 57. Did you require hospitalization?                                                                           | Yes  |          | No     |         |                |
| 58. Number of days hospitalised                                                                                | <3   | 4-7      | 8-14   | 15-21   | >21            |
| 59. Did you require Oxygen at any time?                                                                        | Yes  |          | No     |         |                |
| 60. Were you admitted to ICU?                                                                                  | Yes  |          | No     |         |                |
| 61. Do you feel that you have fully recovered physically from COVID-19?                                        | Yes  |          | No     |         |                |
| 62. How many 'sick days' have you taken due to COVID-19?                                                       | <7   | 7-14     | 15-21  | 22-28   | >28            |



## ECHAS STUDY QUESTIONNAIRE – 2020<sub>v2.0</sub>

| H. PERSISTENCE OF COVID-19 SYMPTOMS (Answer only if 'yes' selected in no.42)<br>(i.e. which, if any, of these symptoms are you still experiencing now?) |     |    |
|---------------------------------------------------------------------------------------------------------------------------------------------------------|-----|----|
| 63. Headaches                                                                                                                                           | Yes | No |
| 64. Weakness                                                                                                                                            | Yes | No |
| 65. Tiredness                                                                                                                                           | Yes | No |
| 66. Shortness of breath                                                                                                                                 | Yes | No |
| 67. Cough                                                                                                                                               | Yes | No |
| 68. Loss of taste/smell                                                                                                                                 | Yes | No |
| 69. Joint pain                                                                                                                                          | Yes | No |
| 70. Dizziness                                                                                                                                           | Yes | No |
| 71. Lack of appetite                                                                                                                                    | Yes | No |
| 72. Muscle pain (myalgia)                                                                                                                               | Yes | No |
| 73. Chest pain                                                                                                                                          | Yes | No |
| 74. List other symptom(s)                                                                                                                               |     |    |
| I. EMPLOYEE WELLNESS Are you currently experiencing any of the following?                                                                               |     |    |
| 75. Anxiety about coming to work:                                                                                                                       | Yes | No |
| 76. Low mood about coming to work:                                                                                                                      | Yes | No |
| 77. Loss of interest in patient care:                                                                                                                   | Yes | No |
| 78. Have you considered resigning/retiring from clinical work?                                                                                          | Yes | No |
| 79. Do you need staff health referral?                                                                                                                  | Yes | No |

### SECTION 2: NURSE MEASUREMENTS & BLOOD SAMPLE FOR SARS-CoV-2 SEROLOGY (All participants)

|                                                         |     |    |
|---------------------------------------------------------|-----|----|
| 80. Weight (Kg)                                         |     |    |
| 81. Height (cm)                                         |     |    |
| 82. Mid-upper arm circumference (cm)                    |     |    |
| 83. Bar Code (Specimen Identifier)                      |     |    |
| 84. Would you like to be notified of the blood results? | Yes | No |
